# Supplementary material
Source: PubMed Central journal article supplement (PMC10013578)
Supplement: NIHMS1864392-supplement-Supplemental_Data.pdf [file NIHMS1864392-supplement-Supplemental_Data.pdf]

# Homeostatic, non-canonical role of macrophage elastase in vascular integrity

*Salarian, Ghim et al.*

## Supplemental Materials

|                                                     |       |
|-----------------------------------------------------|-------|
| <b>Table of Contents</b> .....                      | 1     |
| <b>Supplemental Figures</b> .....                   | 3-15  |
| Figure S1.....                                      | 4     |
| Figure S2.....                                      | 5     |
| Figure S3.....                                      | 6     |
| Figure S4.....                                      | 7     |
| Figure S5.....                                      | 8     |
| Figure S6.....                                      | 9     |
| Figure S7.....                                      | 10    |
| Figure S8.....                                      | 11    |
| Figure S9.....                                      | 12    |
| Figure S10.....                                     | 13    |
| Figure S11.....                                     | 14    |
| Figure S12.....                                     | 15    |
| <b>Supplemental Statistical Analysis Data</b> ..... | 16-47 |
| Figure 1.....                                       | 17    |
| Figure 2.....                                       | 19    |
| Figure 3.....                                       | 21    |
| Figure 4.....                                       | 23    |
| Figure 5.....                                       | 26    |
| Figure 6.....                                       | 28    |

|                                   |              |
|-----------------------------------|--------------|
| Figure S2.....                    | 31           |
| Figure S3.....                    | 33           |
| Figure S4.....                    | 35           |
| Figure S5.....                    | 37           |
| Figure S6.....                    | 39           |
| Figure S7.....                    | 41           |
| Figure S8.....                    | 43           |
| Figure S9.....                    | 45           |
| Figure S12.....                   | 47           |
| <b>Major Resources Table.....</b> | <b>49-54</b> |

# Supplemental Figures

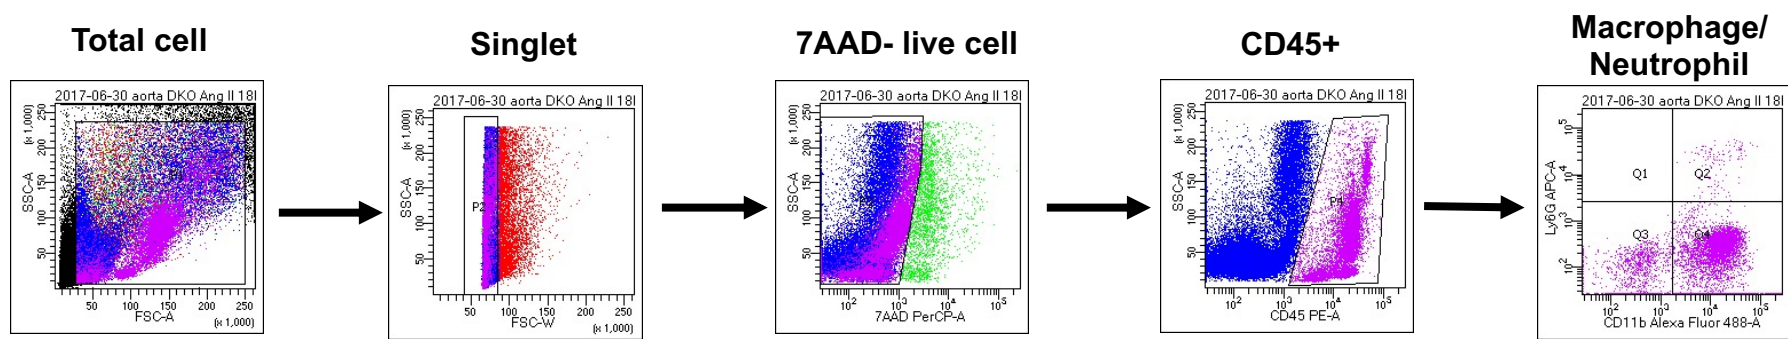

**Figure S1. Gating Strategy for Flow Cytometry.** Forward and side scatter density plots were used to exclude debris and single cells were identified based on FSC-W / SSC-A plots. Live cells were identified from 7AAD- density plots and CD45+ cells were gated on. Finally, the CD45+ population was further analyzed for the CD11b and Ly6g signal to identify macrophage and neutrophil populations.

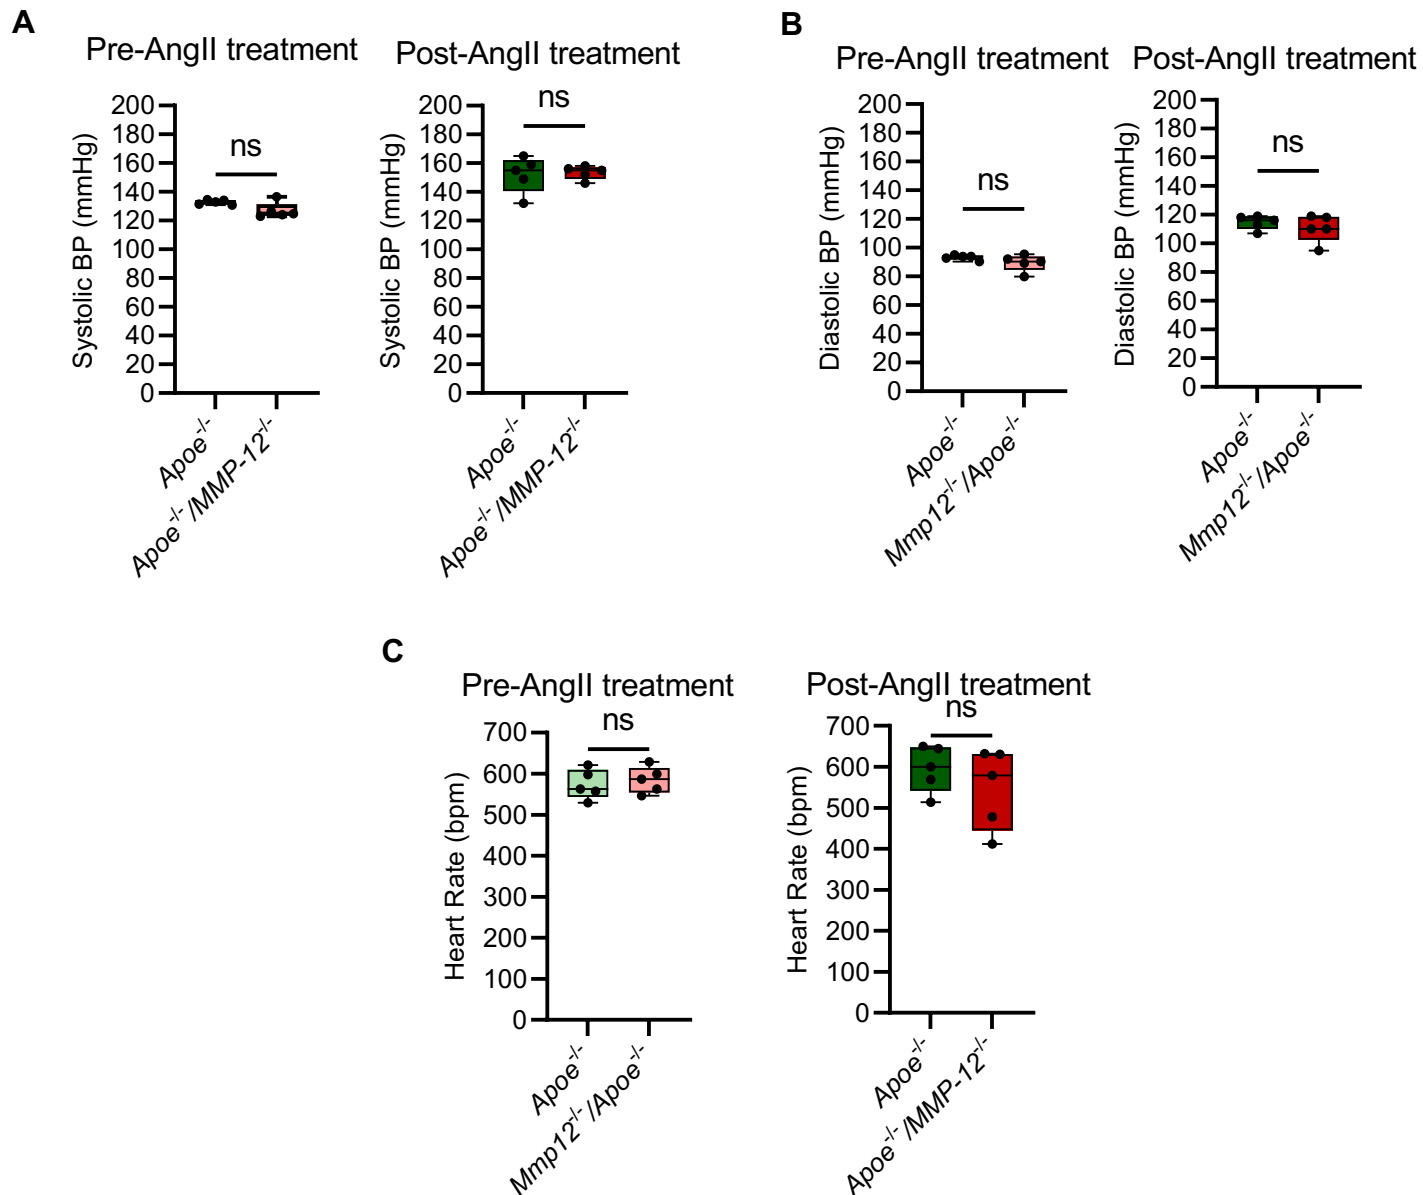

**Figure S2. Effect of *Mmp12* deletion on blood pressure before and after AngII infusion in *Apoe*<sup>-/-</sup> mice.** Average systolic (A) and diastolic (B) blood pressure (BP) and heart rate (C) over 24 hours prior to minipump implantation (pre-AngII), and the first 12 h of Ang-II infusion. n = 5 per group; \*P < 0.05 by two-tailed Mann-Whitney U test.

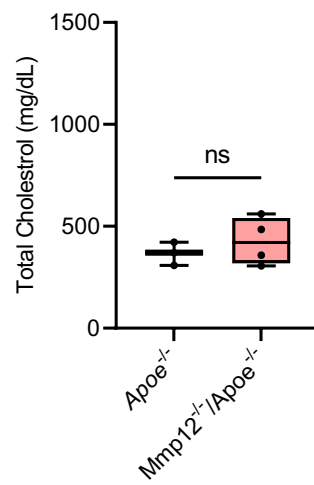

**Figure S3. Total cholesterol level in *Apoe*<sup>-/-</sup> (n=3) and *Mmp12*<sup>-/-</sup> / *Apoe*<sup>-/-</sup> (n=4) mice.**  
ns: not significant by two-tailed Mann-Whitney U test.

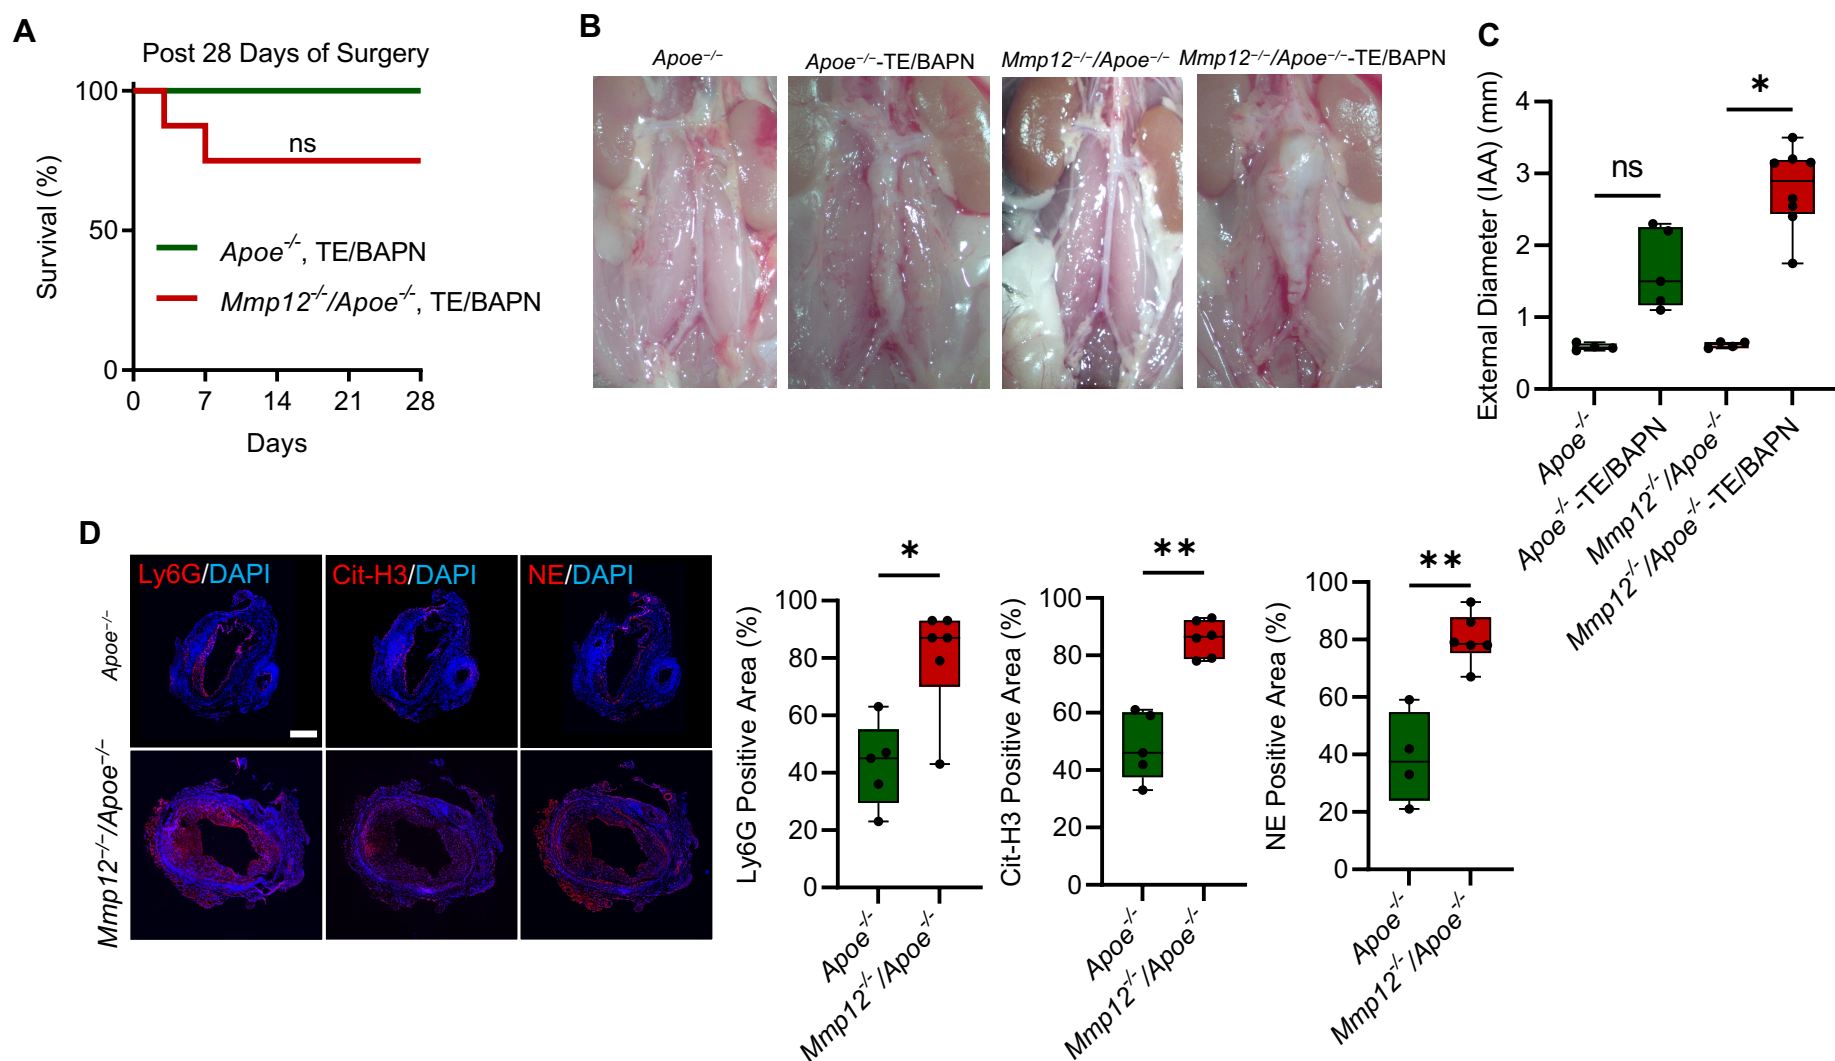

**Figure S4. Effect of *Mmp12* deletion on BAPN/elastase-induced AAA development, progression, and survival in *Apoe*<sup>-/-</sup> mice.** **A.** Kaplan-Meier survival curves of BAPN/elastase-induced AAA in *Apoe*<sup>-/-</sup> (n = 5) and *Mmp12*<sup>-/-</sup>/*Apoe*<sup>-/-</sup> (n = 8) mice. The curves were compared using Log-rank (Mantel-Cox) test. ns: not significant. **B, C.** Representative images of infrarenal abdominal aorta (**B**) and quantification of its maximal external diameter (**C**) at baseline (no surgery) and 28 days post-surgery to induce AAA in *Apoe*<sup>-/-</sup> and *Mmp12*<sup>-/-</sup>/*Apoe*<sup>-/-</sup> mice; n = 4 to 8. \*P < 0.05 by Kruskal-Wallis test with Dunn's multiple comparisons test. **D.** Representative images of immunofluorescence staining and quantification of neutrophils (Ly6G, red), neutrophil extracellular traps (Cit-H3, red), and NE (red) in infrarenal abdominal aortae of surviving *Apoe*<sup>-/-</sup> and *Mmp12*<sup>-/-</sup>/*Apoe*<sup>-/-</sup> mice at 28 days post-surgery. Nuclei are stained blue with DAPI. n = 5 per group. Scale bar: 500  $\mu$ m. \*P < 0.05, \*\*P < 0.01 by two-tailed Mann-Whitney U test. BAPN:  $\beta$ -aminopropionitrile, Cit-H3: citrullinated histone 3, NE: neutrophil elastase.

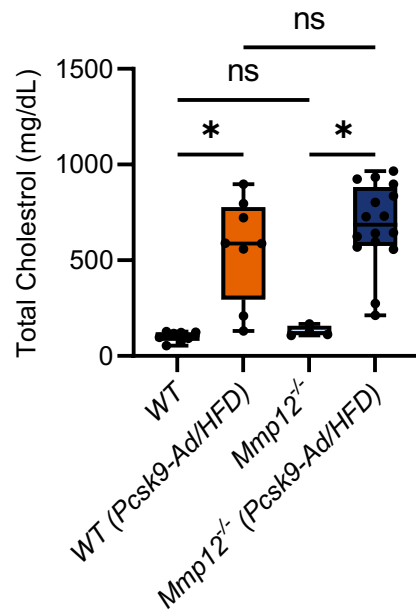

**Figure S5. Effect of Mmp12 deletion on serum cholesterol levels.** Total serum cholesterol level in wildtype (WT) and Mmp12<sup>-/-</sup> mice before, and 14 days after AAV8-PCSK9 (Pcsk9-Ad) injection and high fat diet (HFD). n = 4 to 16 per group; \*P < 0.05 by Kruskal-Wallis test with Dunn's multiple comparisons test. ns: not significant.



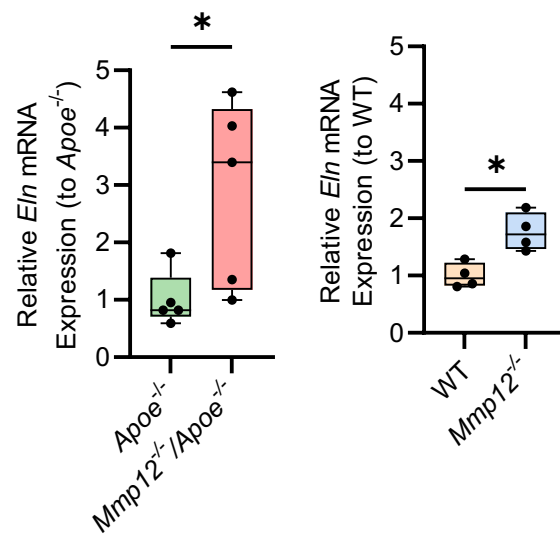

**Figure S6. Effect of Mmp12 deletion on elastin gene expression.** Elastin (*Eln*) gene expression levels in the aorta of *Apoe*<sup>-/-</sup> and *Mmp12*<sup>-/-</sup>/*Apoe*<sup>-/-</sup> (left), and wild-type (WT) and *Mmp12*<sup>-/-</sup> (right) mice. *Eln* expression was normalized to  $\beta$ -actin, n = 4 to 5 per group. \*P < 0.05 by two-tailed Mann-Whitney U test.

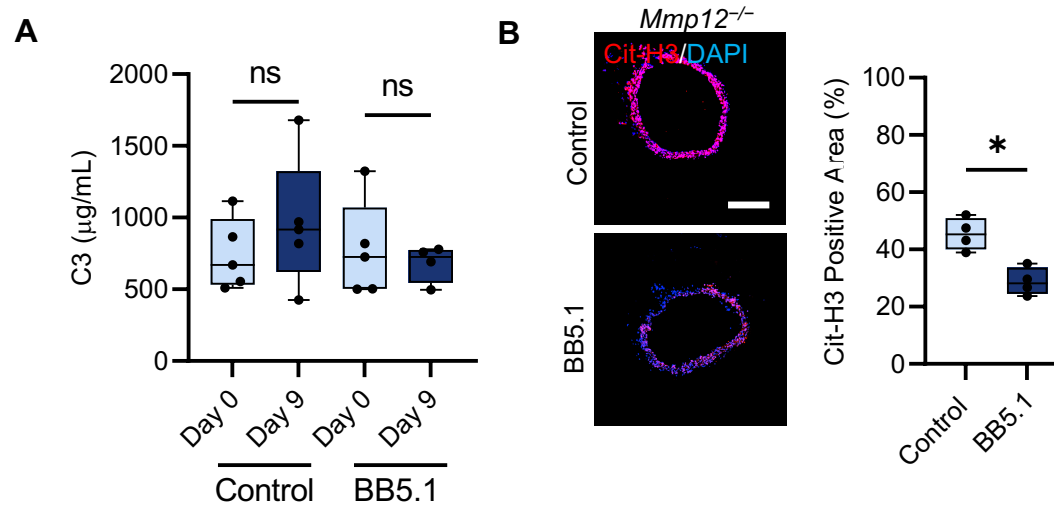

**Figure S7. Effect of anti-C5 antibody (BB5.1) on complement system activation and aortic wall NETosis in *Mmp12*<sup>-/-</sup> mice.** **A.** Plasma C3 levels in *Mmp12*<sup>-/-</sup> mice at baseline and 9 days posttreatment with anti-C5 (BB5.1) or MOPC (control) antibodies. n = 5 per group; ns: not significant by Kruskal-Wallis test with Dunn's multiple comparisons post hoc test. **B.** Representative images of immunofluorescence staining and quantification of suprarenal abdominal aorta Cit-H3 (red) in *Mmp12*<sup>-/-</sup> at 9 days post-treatment with BB5.1 or MOPC antibodies. n = 4 per group ; Scale bar: 500 µm. \*P < 0.05 by two-tailed Mann-Whitney U test.

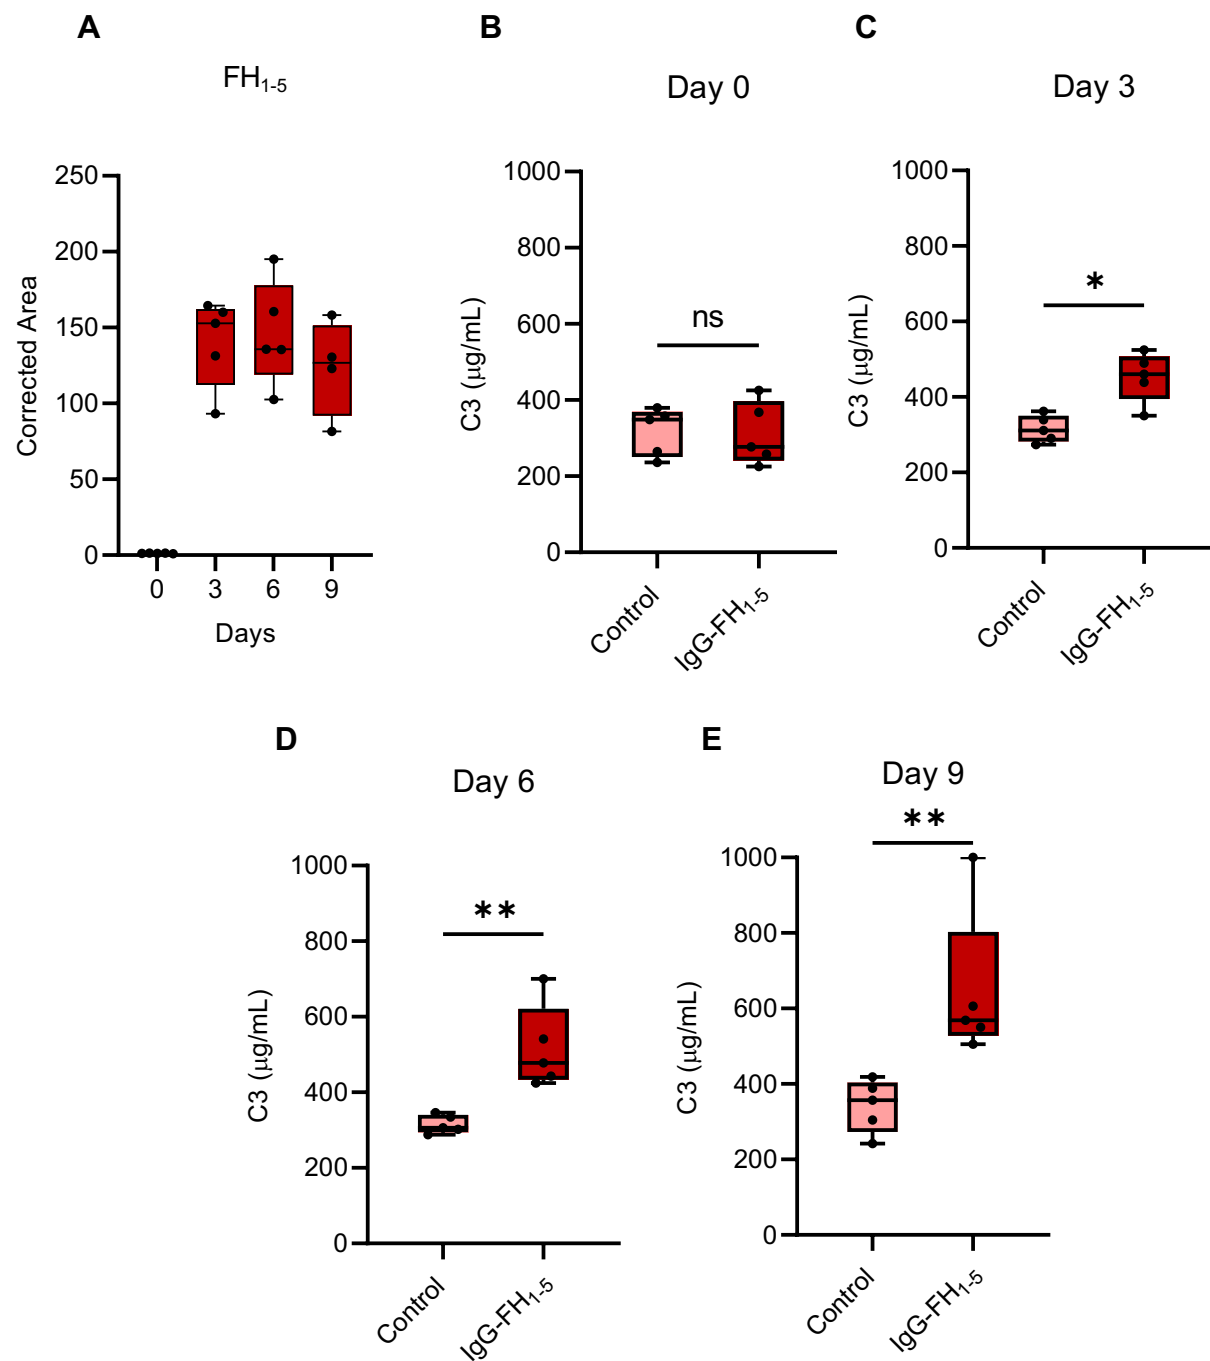

**Figure S8. Effect of IgG-FH1-5 on complement system activation in *Mmp12*<sup>-/-</sup>/*Apoe*<sup>-/-</sup> mice.** **A.** Western blotting-based quantification of plasma FH1-5 levels at 0, 3, 6, and 9 days post-injection with IgGFH1-5. **B-E.** Plasma C3 levels in *Mmp12*<sup>-/-</sup>/*Apoe*<sup>-/-</sup> mice at 0, 3, 6, and 9 days post treatment of IgGFH1-5 or MOPC antibody (control). n = 5 per group. \*P < 0.05, \*\*P < 0.01 by two-tailed Mann-Whitney U test.

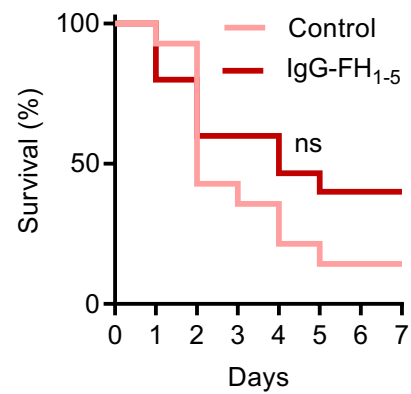

**Figure S9. Effect of IgG-FH1-5 on survival post AngII infusion in *Mmp12*<sup>-/-</sup>/*ApoE*<sup>-/-</sup> mice.** Kaplan-Meier survival curves of AngII-induced AAA in *Mmp12*<sup>-/-</sup>/*ApoE*<sup>-/-</sup> mice post treatment with IgG-FH1-5 (n = 15) or MOPC antibody (control) (n = 14). The curves were compared using Log-rank (Mantel Cox) test. ns: not significant.

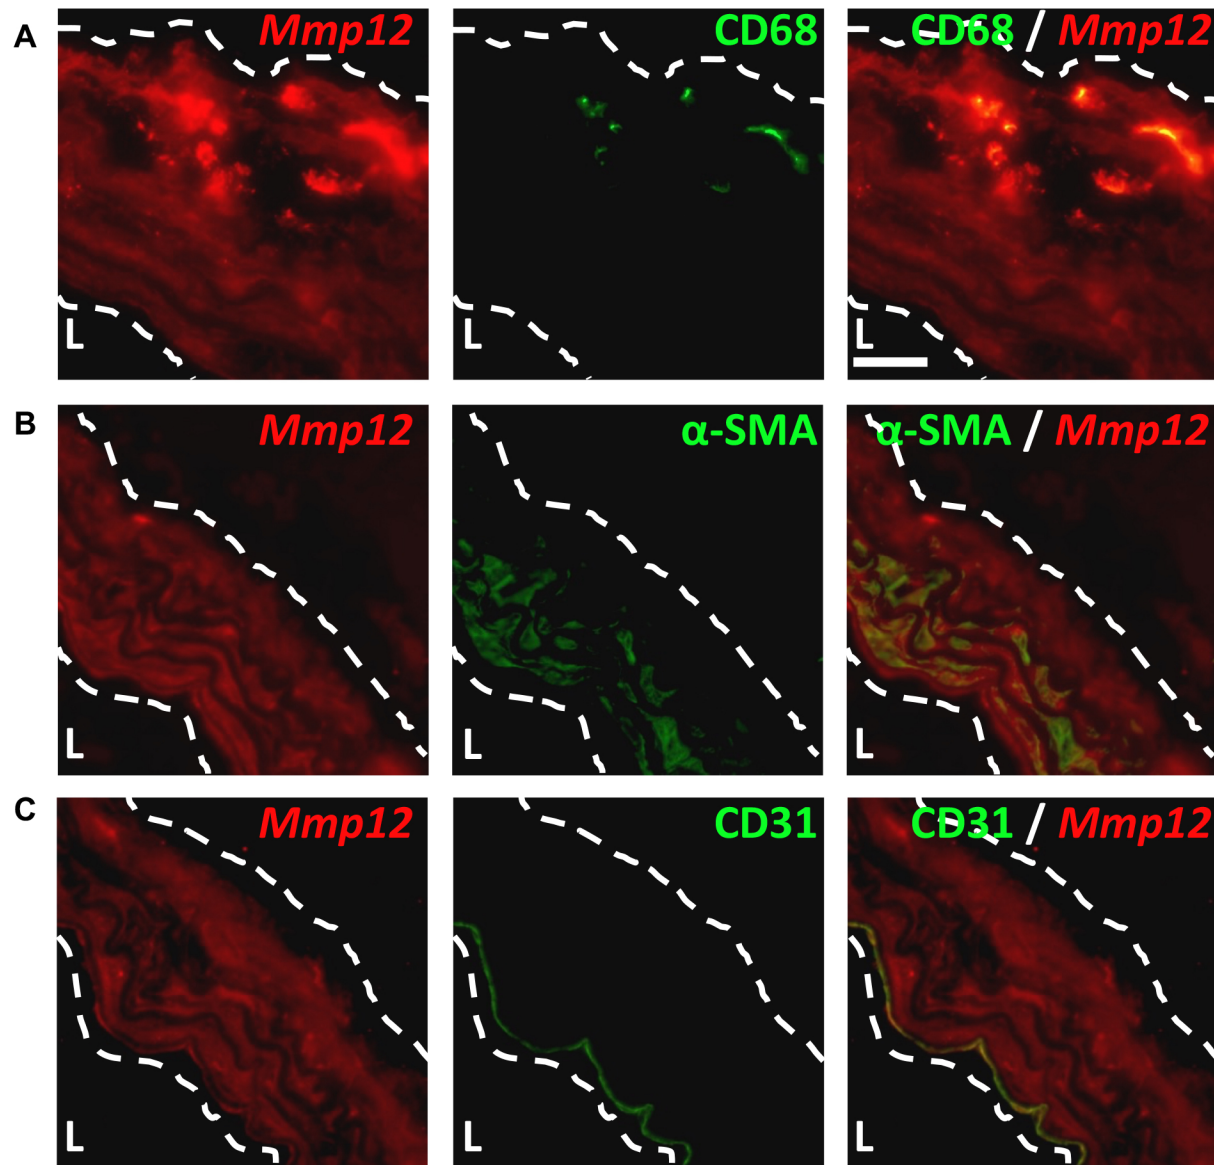

**Figure S10. *Mmp12* mRNA expression detected by fluorescence in situ hybridization in suprenal abdominal aortae of *Mmp12*<sup>flox/flox</sup>/*Apoe*<sup>-/-</sup> mice.** Representative immunofluorescence images of *Mmp12* mRNA (in red) co-stained with CD68 (**A**),  $\alpha$ -smooth muscle actin (SMA, **B**), or CD31 (**C**) in green. White dashed lines indicate the boundaries of the aorta on the luminal and adventitial sides. L: lumen. Scale bar = 50  $\mu$ m.

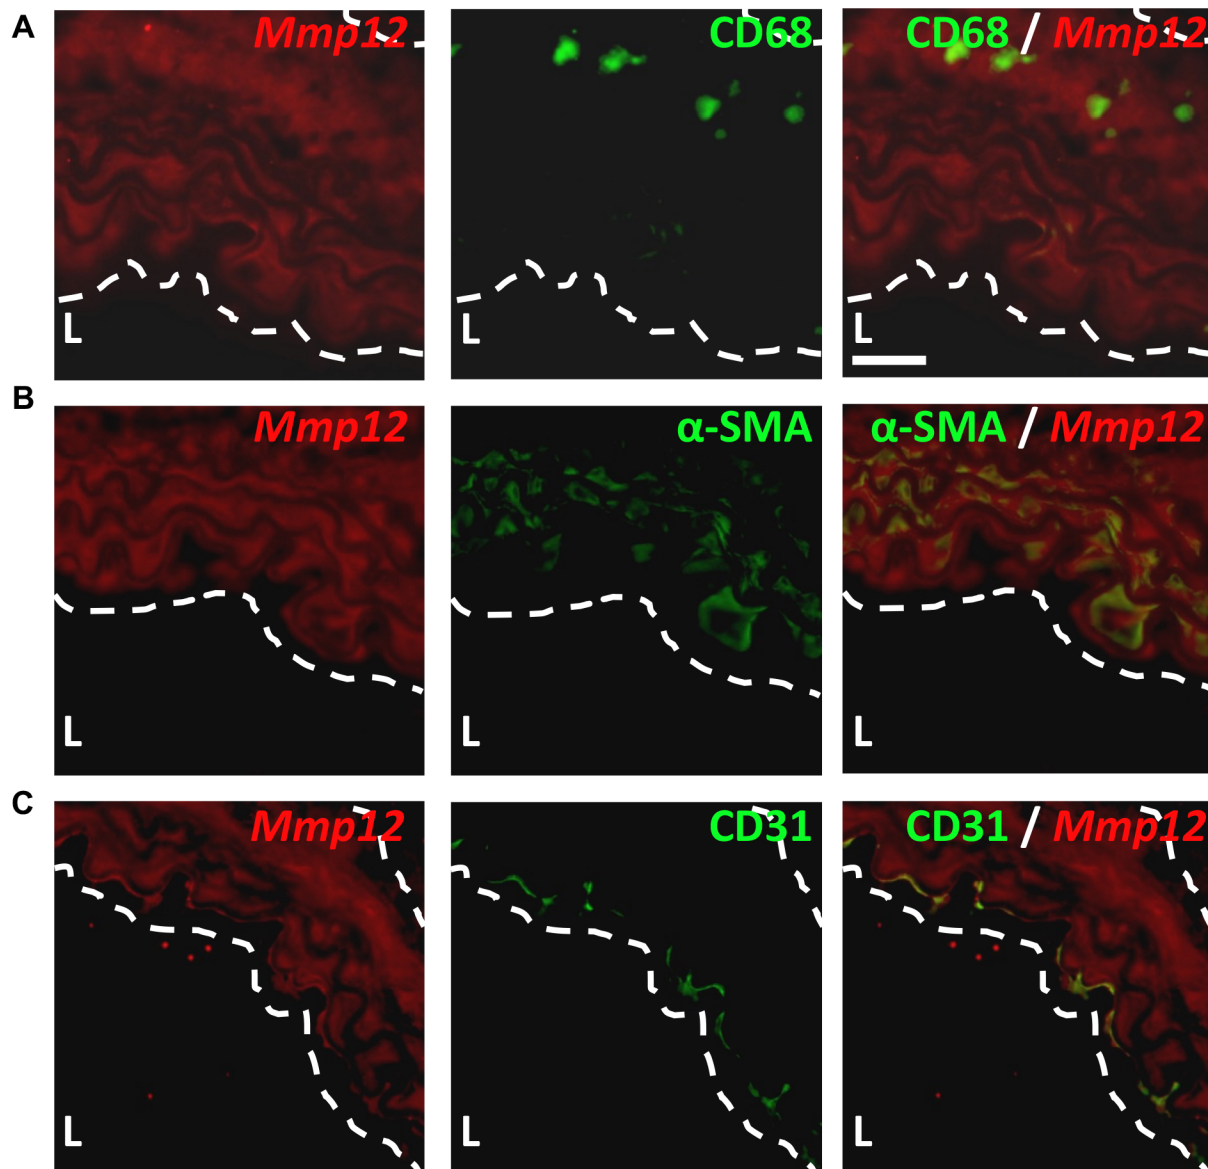

**Figure S11. Cellular selectivity of *Mmp12* mRNA expression detected by fluorescence in situ hybridization in suprarenal abdominal aortae of tamoxifen-treated *Mmp12*<sup>flox/flox</sup>/*ApoE*<sup>-/-</sup>/*Csf1r-iCre* mice.** Representative immunofluorescence images of *Mmp12* mRNA (in red) co-stained with CD68 (**A**),  $\alpha$ -smooth muscle actin (SMA, **B**), or CD31 (**C**) in green. White dashed lines indicate the boundaries of the aorta on the luminal and adventitial sides. L: lumen. Scale bar = 50  $\mu$ m.

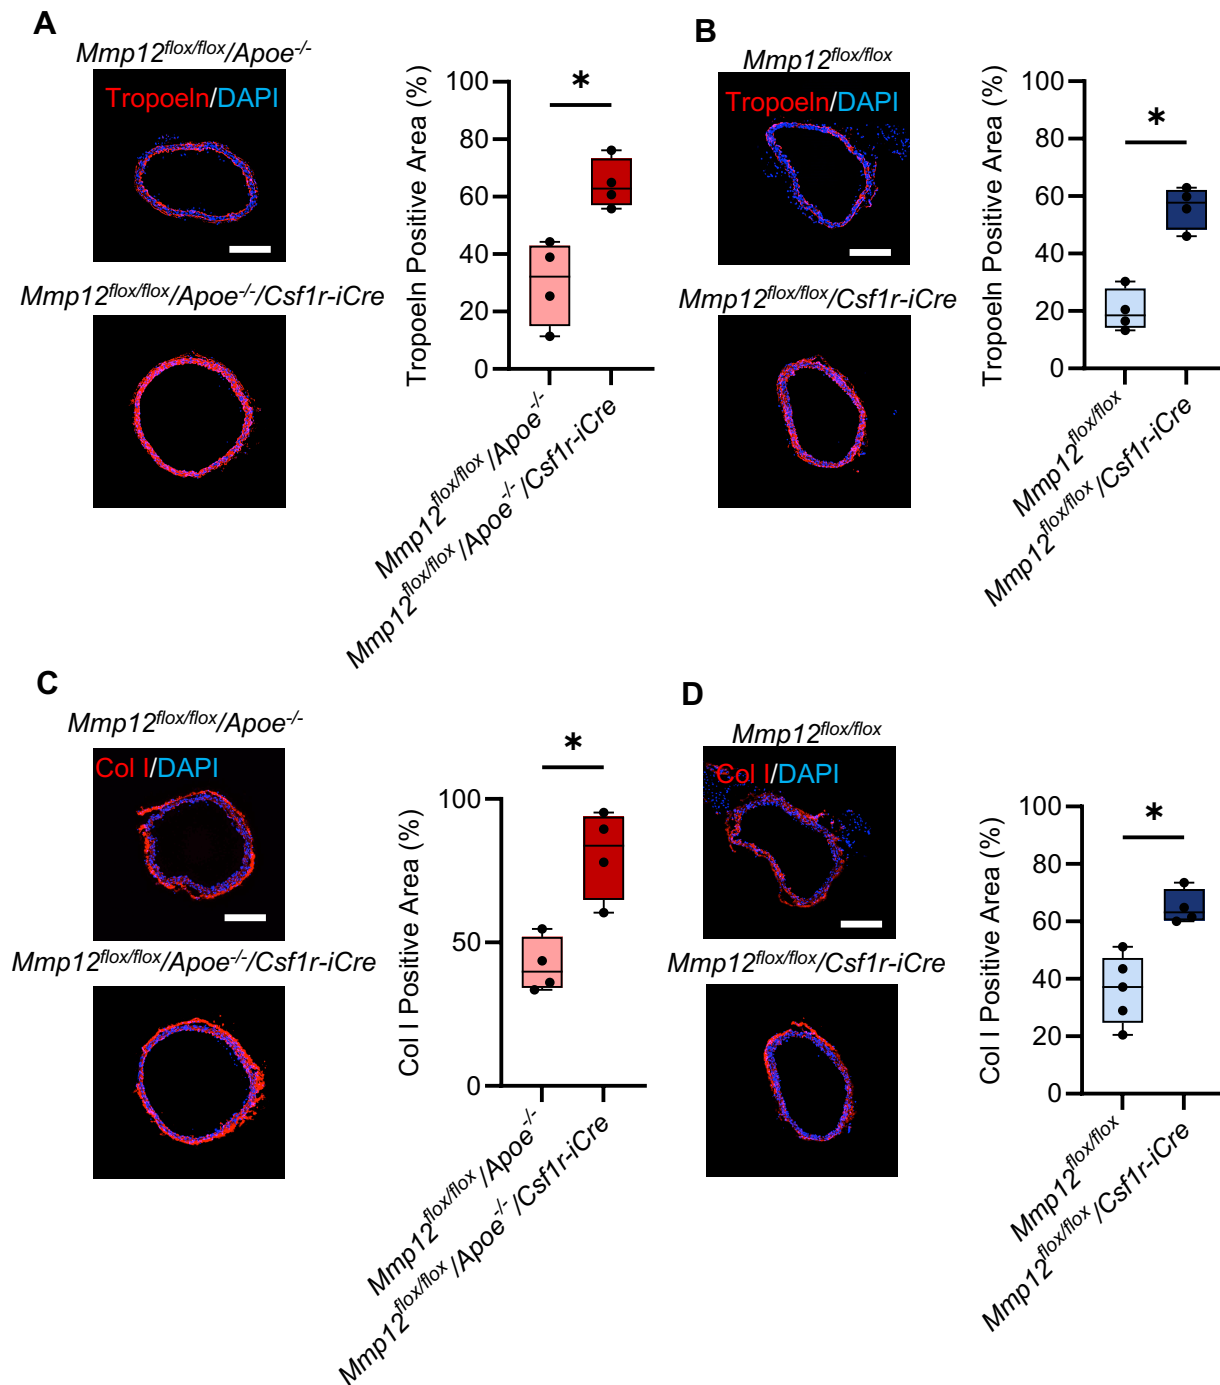

**Figure S12. Effect of macrophage *Mmp12* deficiency on extracellular matrix composition of aortic wall.** Representative images of immunofluorescence staining and quantification of tropoelastin (red, **A** and **B**) and collagen type I (red, **C** and **D**) in suprarenal abdominal aorta of *Mmp12<sup>flox/flox</sup>/Apoe<sup>-/-</sup>* and *Mmp12<sup>flox/flox</sup>/Apoe<sup>-/-</sup>/Csf1r-iCre* (**A** and **C**) *Mmp12<sup>flox/flox</sup>* and *Mmp12<sup>flox/flox</sup>/Csf1r-iCre* (**B** and **D**) mice following tamoxifen administration. Nuclei are stained blue with DAPI. n = 4 per group; Scale bar: 500  $\mu$ m. \*P < 0.05 by two-tailed Mann-Whitney U test.

# Supplemental Statistical Analysis Data



# Figure 1

|          |                                        |         |
|----------|----------------------------------------|---------|
| <b>A</b> | Log-rank (Mantel-Cox) test             |         |
|          | Chi square                             | 46.01   |
|          | df                                     | 1       |
|          | P value                                | <0.0001 |
|          | P value summary                        | ****    |
|          | Are the survival curves sig different? | Yes     |

|          |                                                                                                |                 |              |         |                  |
|----------|------------------------------------------------------------------------------------------------|-----------------|--------------|---------|------------------|
| <b>B</b> | Dunn's multiple comparisons test                                                               | Mean rank diff. | Significant? | Summary | Adjusted P Value |
|          | Apoe <sup>-/-</sup> vs. Apoe <sup>-/-</sup> Ang II                                             | -9.607          | No           | ns      | 0.2704           |
|          | Apoe <sup>-/-</sup> vs. Mmp12 <sup>-/-</sup> /Apoe <sup>-/-</sup>                              | -0.4167         | No           | ns      | >0.9999          |
|          | Apoe <sup>-/-</sup> vs. Mmp12 <sup>-/-</sup> /Apoe <sup>-/-</sup> Ang II                       | -13.19          | Yes          | *       | 0.0246           |
|          | Apoe <sup>-/-</sup> Ang II vs. Mmp12 <sup>-/-</sup> /Apoe <sup>-/-</sup>                       | 9.19            | No           | ns      | 0.1847           |
|          | Apoe <sup>-/-</sup> Ang II vs. Mmp12 <sup>-/-</sup> /Apoe <sup>-/-</sup> Ang II                | -3.587          | No           | ns      | >0.9999          |
|          | Mmp12 <sup>-/-</sup> /Apoe <sup>-/-</sup> vs. Mmp12 <sup>-/-</sup> /Apoe <sup>-/-</sup> Ang II | -12.78          | Yes          | **      | 0.0092           |

|          |                                                                                                |                 |              |         |                  |
|----------|------------------------------------------------------------------------------------------------|-----------------|--------------|---------|------------------|
| <b>C</b> | Dunn's multiple comparisons test                                                               | Mean rank diff. | Significant? | Summary | Adjusted P Value |
|          | Apoe <sup>-/-</sup> vs. Apoe <sup>-/-</sup> Ang II                                             | -8.821          | No           | ns      | 0.3945           |
|          | Apoe <sup>-/-</sup> vs. Mmp12 <sup>-/-</sup> /Apoe <sup>-/-</sup>                              | -0.5833         | No           | ns      | >0.9999          |
|          | Apoe <sup>-/-</sup> vs. Mmp12 <sup>-/-</sup> /Apoe <sup>-/-</sup> Ang II                       | -9.361          | No           | ns      | 0.2501           |
|          | Apoe <sup>-/-</sup> Ang II vs. Mmp12 <sup>-/-</sup> /Apoe <sup>-/-</sup>                       | 8.238           | No           | ns      | 0.3172           |
|          | Apoe <sup>-/-</sup> Ang II vs. Mmp12 <sup>-/-</sup> /Apoe <sup>-/-</sup> Ang II                | -0.5397         | No           | ns      | >0.9999          |
|          | Mmp12 <sup>-/-</sup> /Apoe <sup>-/-</sup> vs. Mmp12 <sup>-/-</sup> /Apoe <sup>-/-</sup> Ang II | -8.778          | No           | ns      | 0.1767           |

|          |                                                                                                |                 |              |         |                  |
|----------|------------------------------------------------------------------------------------------------|-----------------|--------------|---------|------------------|
| <b>D</b> | Dunn's multiple comparisons test                                                               | Mean rank diff. | Significant? | Summary | Adjusted P Value |
|          | Apoe <sup>-/-</sup> vs. Apoe <sup>-/-</sup> Ang II                                             | -8.875          | No           | ns      | 0.384            |
|          | Apoe <sup>-/-</sup> vs. Mmp12 <sup>-/-</sup> /Apoe <sup>-/-</sup>                              | -1.208          | No           | ns      | >0.9999          |
|          | Apoe <sup>-/-</sup> vs. Mmp12 <sup>-/-</sup> /Apoe <sup>-/-</sup> Ang II                       | -15.04          | Yes          | **      | 0.0064           |
|          | Apoe <sup>-/-</sup> Ang II vs. Mmp12 <sup>-/-</sup> /Apoe <sup>-/-</sup>                       | 7.667           | No           | ns      | 0.4287           |
|          | Apoe <sup>-/-</sup> Ang II vs. Mmp12 <sup>-/-</sup> /Apoe <sup>-/-</sup> Ang II                | -6.167          | No           | ns      | 0.6567           |
|          | Mmp12 <sup>-/-</sup> /Apoe <sup>-/-</sup> vs. Mmp12 <sup>-/-</sup> /Apoe <sup>-/-</sup> Ang II | -13.83          | Yes          | **      | 0.0036           |

|          |                                     |            |                                     |            |                                     |            |
|----------|-------------------------------------|------------|-------------------------------------|------------|-------------------------------------|------------|
| <b>E</b> | <u>Ly6G</u>                         |            | <u>Cit-H3</u>                       |            | <u>NE</u>                           |            |
|          | Mann Whitney test                   |            | Mann Whitney test                   |            | Mann Whitney test                   |            |
|          | P value                             | 0.0286     | P value                             | 0.0286     | P value                             | 0.0286     |
|          | Exact or approximate P value?       | Exact      | Exact or approximate P value?       | Exact      | Exact or approximate P value?       | Exact      |
|          | P value summary                     | *          | P value summary                     | *          | P value summary                     | *          |
|          | Significantly different (P < 0.05)? | Yes        | Significantly different (P < 0.05)? | Yes        | Significantly different (P < 0.05)? | Yes        |
|          | One- or two-tailed P value?         | Two-tailed | One- or two-tailed P value?         | Two-tailed | One- or two-tailed P value?         | Two-tailed |
|          | Sum of ranks in column A,B          | 10 , 26    | Sum of ranks in column A,B          | 10 , 26    | Sum of ranks in column A,B          | 10 , 26    |
|          | Mann-Whitney U                      | 0          | Mann-Whitney U                      | 0          | Mann-Whitney U                      | 0          |

|          |                                     |            |                                     |            |                                     |            |
|----------|-------------------------------------|------------|-------------------------------------|------------|-------------------------------------|------------|
| <b>F</b> | <u>Ly6G</u>                         |            | <u>Cit-H3</u>                       |            | <u>NE</u>                           |            |
|          | Mann Whitney test                   |            | Mann Whitney test                   |            | Mann Whitney test                   |            |
|          | P value                             | 0.0286     | P value                             | 0.0286     | P value                             | 0.0286     |
|          | Exact or approximate P value?       | Exact      | Exact or approximate P value?       | Exact      | Exact or approximate P value?       | Exact      |
|          | P value summary                     | *          | P value summary                     | *          | P value summary                     | *          |
|          | Significantly different (P < 0.05)? | Yes        | Significantly different (P < 0.05)? | Yes        | Significantly different (P < 0.05)? | Yes        |
|          | One- or two-tailed P value?         | Two-tailed | One- or two-tailed P value?         | Two-tailed | One- or two-tailed P value?         | Two-tailed |
|          | Sum of ranks in column A,B          | 10 , 26    | Sum of ranks in column A,B          | 10 , 26    | Sum of ranks in column A,B          | 10 , 26    |
|          | Mann-Whitney U                      | 0          | Mann-Whitney U                      | 0          | Mann-Whitney U                      | 0          |

# Figure 2

**A**

|                                        |       |
|----------------------------------------|-------|
| Log-rank (Mantel-Cox) test             |       |
| Chi square                             | 4.176 |
| df                                     | 1     |
| P value                                | 0.041 |
| P value summary                        | *     |
| Are the survival curves sig different? | Yes   |

**B**

| Dunn's multiple comparisons test                      | Mean rank diff. | Significant? | Summary | Adjusted P Value |
|-------------------------------------------------------|-----------------|--------------|---------|------------------|
| Mmp12 <sup>-/-</sup> -Ang II vs. WT                   | 14.88           | Yes          | **      | 0.0023           |
| Mmp12 <sup>-/-</sup> -Ang II vs. WT-Ang II            | 12.06           | Yes          | **      | 0.0022           |
| Mmp12 <sup>-/-</sup> -Ang II vs. Mmp12 <sup>-/-</sup> | 11              | Yes          | *       | 0.0383           |

**C**

|                                     |            |
|-------------------------------------|------------|
| <u>Ly6G</u>                         |            |
| Mann Whitney test                   |            |
| P value                             | 0.0286     |
| Exact or approximate P value?       | Exact      |
| P value summary                     | *          |
| Significantly different (P < 0.05)? | Yes        |
| One- or two-tailed P value?         | Two-tailed |
| Sum of ranks in column A,B          | 10 , 26    |
| Mann-Whitney U                      | 0          |

|                                     |            |
|-------------------------------------|------------|
| <u>Cit-H3</u>                       |            |
| Mann Whitney test                   |            |
| P value                             | 0.0286     |
| Exact or approximate P value?       | Exact      |
| P value summary                     | *          |
| Significantly different (P < 0.05)? | Yes        |
| One- or two-tailed P value?         | Two-tailed |
| Sum of ranks in column A,B          | 10 , 26    |
| Mann-Whitney U                      | 0          |

|                                     |            |
|-------------------------------------|------------|
| <u>NE</u>                           |            |
| Mann Whitney test                   |            |
| P value                             | 0.0286     |
| Exact or approximate P value?       | Exact      |
| P value summary                     | *          |
| Significantly different (P < 0.05)? | Yes        |
| One- or two-tailed P value?         | Two-tailed |
| Sum of ranks in column A,B          | 10 , 26    |
| Mann-Whitney U                      | 0          |

**D**

|                                     |            |
|-------------------------------------|------------|
| <u>Ly6G</u>                         |            |
| Mann Whitney test                   |            |
| P value                             | 0.0286     |
| Exact or approximate P value?       | Exact      |
| P value summary                     | *          |
| Significantly different (P < 0.05)? | Yes        |
| One- or two-tailed P value?         | Two-tailed |
| Sum of ranks in column A,B          | 10 , 26    |
| Mann-Whitney U                      | 0          |

|                                     |            |
|-------------------------------------|------------|
| <u>Cit-H3</u>                       |            |
| Mann Whitney test                   |            |
| P value                             | 0.0286     |
| Exact or approximate P value?       | Exact      |
| P value summary                     | *          |
| Significantly different (P < 0.05)? | Yes        |
| One- or two-tailed P value?         | Two-tailed |
| Sum of ranks in column A,B          | 10 , 26    |
| Mann-Whitney U                      | 0          |

|                                     |            |
|-------------------------------------|------------|
| <u>NE</u>                           |            |
| Mann Whitney test                   |            |
| P value                             | 0.0286     |
| Exact or approximate P value?       | Exact      |
| P value summary                     | *          |
| Significantly different (P < 0.05)? | Yes        |
| One- or two-tailed P value?         | Two-tailed |
| Sum of ranks in column A,B          | 10 , 26    |
| Mann-Whitney U                      | 0          |

# Figure 3

|          |                                     |            |
|----------|-------------------------------------|------------|
| <b>B</b> | Mann Whitney test                   |            |
|          | P value                             | 0.0286     |
|          | Exact or approximate P value?       | Exact      |
|          | P value summary                     | *          |
|          | Significantly different (P < 0.05)? | Yes        |
|          | One- or two-tailed P value?         | Two-tailed |
|          | Sum of ranks in column A,B          | 10 , 26    |
|          | Mann-Whitney U                      | 0          |

|          |                                     |            |
|----------|-------------------------------------|------------|
| <b>F</b> | Mann Whitney test                   |            |
|          | P value                             | 0.0286     |
|          | Exact or approximate P value?       | Exact      |
|          | P value summary                     | *          |
|          | Significantly different (P < 0.05)? | Yes        |
|          | One- or two-tailed P value?         | Two-tailed |
|          | Sum of ranks in column A,B          | 10 , 26    |
|          | Mann-Whitney U                      | 0          |

|          |                                     |            |
|----------|-------------------------------------|------------|
| <b>C</b> | Mann Whitney test                   |            |
|          | P value                             | 0.0286     |
|          | Exact or approximate P value?       | Exact      |
|          | P value summary                     | *          |
|          | Significantly different (P < 0.05)? | Yes        |
|          | One- or two-tailed P value?         | Two-tailed |
|          | Sum of ranks in column A,B          | 10 , 26    |
|          | Mann-Whitney U                      | 0          |

|          |                                     |            |
|----------|-------------------------------------|------------|
| <b>G</b> | Mann Whitney test                   |            |
|          | P value                             | 0.0286     |
|          | Exact or approximate P value?       | Exact      |
|          | P value summary                     | *          |
|          | Significantly different (P < 0.05)? | Yes        |
|          | One- or two-tailed P value?         | Two-tailed |
|          | Sum of ranks in column A,B          | 10 , 26    |
|          | Mann-Whitney U                      | 0          |

|          |                                     |            |
|----------|-------------------------------------|------------|
| <b>D</b> | Mann Whitney test                   |            |
|          | P value                             | 0.0476     |
|          | Exact or approximate P value?       | Exact      |
|          | P value summary                     | *          |
|          | Significantly different (P < 0.05)? | Yes        |
|          | One- or two-tailed P value?         | Two-tailed |
|          | Sum of ranks in column A,B          | 18 , 37    |
|          | Mann-Whitney U                      | 3          |

|          |                                     |            |
|----------|-------------------------------------|------------|
| <b>E</b> | Mann Whitney test                   |            |
|          | P value                             | 0.0317     |
|          | Exact or approximate P value?       | Exact      |
|          | P value summary                     | *          |
|          | Significantly different (P < 0.05)? | Yes        |
|          | One- or two-tailed P value?         | Two-tailed |
|          | Sum of ranks in column A,B          | 17 , 38    |
|          | Mann-Whitney U                      | 2          |

|          |                                     |            |                                     |            |
|----------|-------------------------------------|------------|-------------------------------------|------------|
| <b>H</b> | DTA                                 |            | SAA                                 |            |
|          | Mann Whitney test                   |            | Mann Whitney test                   |            |
|          | P value                             | 0.0159     | P value                             | 0.0303     |
|          | Exact or approximate P value?       | Exact      | Exact or approximate P value?       | Exact      |
|          | P value summary                     | *          | P value summary                     | *          |
|          | Significantly different (P < 0.05)? | Yes        | Significantly different (P < 0.05)? | Yes        |
|          | One- or two-tailed P value?         | Two-tailed | One- or two-tailed P value?         | Two-tailed |
|          | Sum of ranks in column A,B          | 39 , 16    | Sum of ranks in column A,B          | 42 , 24    |
|          | Mann-Whitney U                      | 1          | Mann-Whitney U                      | 3          |

# Figure 4

|          |                                     |            |
|----------|-------------------------------------|------------|
| <b>A</b> | Mann Whitney test                   |            |
|          | P value                             | 0.0079     |
|          | Exact or approximate P value?       | Exact      |
|          | P value summary                     | **         |
|          | Significantly different (P < 0.05)? | Yes        |
|          | One- or two-tailed P value?         | Two-tailed |
|          | Sum of ranks in column A,B          | 15 , 40    |
|          | Mann-Whitney U                      | 0          |

|          |                                     |            |
|----------|-------------------------------------|------------|
| <b>B</b> | Mann Whitney test                   |            |
|          | P value                             | 0.0079     |
|          | Exact or approximate P value?       | Exact      |
|          | P value summary                     | **         |
|          | Significantly different (P < 0.05)? | Yes        |
|          | One- or two-tailed P value?         | Two-tailed |
|          | Sum of ranks in column A,B          | 15 , 40    |
|          | Mann-Whitney U                      | 0          |

|          |                                     |            |
|----------|-------------------------------------|------------|
| <b>C</b> | <u>C3</u>                           |            |
|          | Mann Whitney test                   |            |
|          | P value                             | 0.0002     |
|          | Exact or approximate P value?       | Exact      |
|          | P value summary                     | ***        |
|          | Significantly different (P < 0.05)? | Yes        |
|          | One- or two-tailed P value?         | Two-tailed |
|          | Sum of ranks in column A,B          | 81 , 55    |

|          |                                     |            |
|----------|-------------------------------------|------------|
| <b>D</b> | <u>C3</u>                           |            |
|          | Mann Whitney test                   |            |
|          | P value                             | <0.0001    |
|          | Exact or approximate P value?       | Exact      |
|          | P value summary                     | ****       |
|          | Significantly different (P < 0.05)? | Yes        |
|          | One- or two-tailed P value?         | Two-tailed |
|          | Sum of ranks in column A,B          | 129 , 171  |
|          | Mann-Whitney U                      | 0          |

|          |                                     |            |
|----------|-------------------------------------|------------|
| <b>E</b> | <u>Control</u>                      |            |
|          | Mann Whitney test                   |            |
|          | P value                             | 0.5476     |
|          | Exact or approximate P value?       | Exact      |
|          | P value summary                     | ns         |
|          | Significantly different (P < 0.05)? | No         |
|          | One- or two-tailed P value?         | Two-tailed |
|          | Sum of ranks in column A,B          | 31 , 24    |
|          | Mann-Whitney U                      | 9          |

|          |                                     |            |
|----------|-------------------------------------|------------|
| <b>F</b> | <u>Control</u>                      |            |
|          | Mann Whitney test                   |            |
|          | P value                             | 0.5476     |
|          | Exact or approximate P value?       | Exact      |
|          | P value summary                     | ns         |
|          | Significantly different (P < 0.05)? | No         |
|          | One- or two-tailed P value?         | Two-tailed |
|          | Sum of ranks in column A,B          | 24 , 31    |
|          | Mann-Whitney U                      | 9          |

|            |                                     |            |
|------------|-------------------------------------|------------|
| <b>C5a</b> |                                     |            |
|            | Mann Whitney test                   |            |
|            | P value                             | 0.04       |
|            | Exact or approximate P value?       | Exact      |
|            | P value summary                     | *          |
|            | Significantly different (P < 0.05)? | Yes        |
|            | One- or two-tailed P value?         | Two-tailed |
|            | Sum of ranks in column A,B          | 23 , 97    |

|            |                                     |            |
|------------|-------------------------------------|------------|
| <b>C5a</b> |                                     |            |
|            | Mann Whitney test                   |            |
|            | P value                             | 0.014      |
|            | Exact or approximate P value?       | Exact      |
|            | P value summary                     | *          |
|            | Significantly different (P < 0.05)? | Yes        |
|            | One- or two-tailed P value?         | Two-tailed |
|            | Sum of ranks in column A,B          | 32 , 59    |
|            | Mann-Whitney U                      | 4          |

|                  |                                     |            |
|------------------|-------------------------------------|------------|
| <b>IgG-FH1-5</b> |                                     |            |
|                  | Mann Whitney test                   |            |
|                  | P value                             | 0.0079     |
|                  | Exact or approximate P value?       | Exact      |
|                  | P value summary                     | **         |
|                  | Significantly different (P < 0.05)? | Yes        |
|                  | One- or two-tailed P value?         | Two-tailed |
|                  | Sum of ranks in column A,B          | 15 , 40    |
|                  | Mann-Whitney U                      | 0          |

|                  |                                     |            |
|------------------|-------------------------------------|------------|
| <b>IgG-FH1-5</b> |                                     |            |
|                  | Mann Whitney test                   |            |
|                  | P value                             | 0.0159     |
|                  | Exact or approximate P value?       | Exact      |
|                  | P value summary                     | *          |
|                  | Significantly different (P < 0.05)? | Yes        |
|                  | One- or two-tailed P value?         | Two-tailed |
|                  | Sum of ranks in column A,B          | 16 , 39    |
|                  | Mann-Whitney U                      | 1          |



|          |                                     |            |
|----------|-------------------------------------|------------|
| <b>G</b> | Mann Whitney test                   |            |
|          | P value                             | 0.0079     |
|          | Exact or approximate P value?       | Exact      |
|          | P value summary                     | **         |
|          | Significantly different (P < 0.05)? | Yes        |
|          | One- or two-tailed P value?         | Two-tailed |
|          | Sum of ranks in column A,B          | 40 , 15    |
|          | Mann-Whitney U                      | 0          |

|          |                                     |            |
|----------|-------------------------------------|------------|
| <b>H</b> | Mann Whitney test                   |            |
|          | P value                             | 0.0079     |
|          | Exact or approximate P value?       | Exact      |
|          | P value summary                     | **         |
|          | Significantly different (P < 0.05)? | Yes        |
|          | One- or two-tailed P value?         | Two-tailed |
|          | Sum of ranks in column A,B          | 40 , 15    |
|          | Mann-Whitney U                      | 0          |

|          |                                     |            |
|----------|-------------------------------------|------------|
| <b>I</b> | Mann Whitney test                   |            |
|          | P value                             | 0.0079     |
|          | Exact or approximate P value?       | Exact      |
|          | P value summary                     | **         |
|          | Significantly different (P < 0.05)? | Yes        |
|          | One- or two-tailed P value?         | Two-tailed |
|          | Sum of ranks in column A,B          | 40 , 15    |
|          | Mann-Whitney U                      | 0          |

|          |                                     |            |
|----------|-------------------------------------|------------|
| <b>J</b> | Mann Whitney test                   |            |
|          | P value                             | 0.0286     |
|          | Exact or approximate P value?       | Exact      |
|          | P value summary                     | *          |
|          | Significantly different (P < 0.05)? | Yes        |
|          | One- or two-tailed P value?         | Two-tailed |
|          | Sum of ranks in column A,B          | 26 , 10    |
|          | Mann-Whitney U                      | 0          |

# Figure 5

|          |                                        |        |
|----------|----------------------------------------|--------|
| <b>A</b> | Log-rank (Mantel-Cox) test             |        |
|          | Chi square                             | 5.194  |
|          | df                                     | 1      |
|          | P value                                | 0.0227 |
|          | P value summary                        | *      |
|          | Are the survival curves sig different? | Yes    |

|          |                                     |            |
|----------|-------------------------------------|------------|
| <b>B</b> | Mann Whitney test                   |            |
|          | P value                             | 0.0162     |
|          | Exact or approximate P value?       | Exact      |
|          | P value summary                     | *          |
|          | Significantly different (P < 0.05)? | Yes        |
|          | One- or two-tailed P value?         | Two-tailed |
|          | Sum of ranks in column A,B          | 40 , 38    |
|          | Mann-Whitney U                      | 2          |

|          |                                     |            |
|----------|-------------------------------------|------------|
| <b>C</b> | Mann Whitney test                   |            |
|          | P value                             | 0.0061     |
|          | Exact or approximate P value?       | Exact      |
|          | P value summary                     | **         |
|          | Significantly different (P < 0.05)? | Yes        |
|          | One- or two-tailed P value?         | Two-tailed |
|          | Sum of ranks in column A,B          | 38 , 28    |
|          | Mann-Whitney U                      | 0          |

|          |                                     |            |
|----------|-------------------------------------|------------|
| <b>D</b> | Ly6G                                |            |
|          | Mann Whitney test                   |            |
|          | P value                             | 0.0242     |
|          | Exact or approximate P value?       | Exact      |
|          | P value summary                     | *          |
|          | Significantly different (P < 0.05)? | Yes        |
|          | One- or two-tailed P value?         | Two-tailed |
|          | Sum of ranks in column A,B          | 36 , 30    |
|          | Mann-Whitney U                      | 2          |

|  |                                     |            |
|--|-------------------------------------|------------|
|  | Cit-H3                              |            |
|  | Mann Whitney test                   |            |
|  | P value                             | 0.0061     |
|  | Exact or approximate P value?       | Exact      |
|  | P value summary                     | **         |
|  | Significantly different (P < 0.05)? | Yes        |
|  | One- or two-tailed P value?         | Two-tailed |
|  | Sum of ranks in column A,B          | 38 , 28    |
|  | Mann-Whitney U                      | 0          |

|  |                                     |            |
|--|-------------------------------------|------------|
|  | NE                                  |            |
|  | Mann Whitney test                   |            |
|  | P value                             | 0.0061     |
|  | Exact or approximate P value?       | Exact      |
|  | P value summary                     | **         |
|  | Significantly different (P < 0.05)? | Yes        |
|  | One- or two-tailed P value?         | Two-tailed |
|  | Sum of ranks in column A,B          | 38 , 28    |
|  | Mann-Whitney U                      | 0          |

# Figure 6

|          |                                     |            |
|----------|-------------------------------------|------------|
| <b>A</b> | Mann Whitney test                   |            |
|          | P value                             | 0.0159     |
|          | Exact or approximate P value?       | Exact      |
|          | P value summary                     | *          |
|          | Significantly different (P < 0.05)? | Yes        |
|          | One- or two-tailed P value?         | Two-tailed |
|          | Sum of ranks in column A,B          | 35 , 10    |
|          | Mann-Whitney U                      | 0          |

|          |                                     |            |
|----------|-------------------------------------|------------|
| <b>B</b> | Mann Whitney test                   |            |
|          | P value                             | 0.0159     |
|          | Exact or approximate P value?       | Exact      |
|          | P value summary                     | *          |
|          | Significantly different (P < 0.05)? | Yes        |
|          | One- or two-tailed P value?         | Two-tailed |
|          | Sum of ranks in column A,B          | 35 , 10    |
|          | Mann-Whitney U                      | 0          |

|          |                                     |            |
|----------|-------------------------------------|------------|
| <b>C</b> | <u>Ly6G</u>                         |            |
|          | Mann Whitney test                   |            |
|          | P value                             | 0.0286     |
|          | Exact or approximate P value?       | Exact      |
|          | P value summary                     | *          |
|          | Significantly different (P < 0.05)? | Yes        |
|          | One- or two-tailed P value?         | Two-tailed |
|          | Sum of ranks in column A,B          | 10 , 26    |
|          | Mann-Whitney U                      | 0          |

|  |                                     |            |
|--|-------------------------------------|------------|
|  | <u>Cit-H3</u>                       |            |
|  | Mann Whitney test                   |            |
|  | P value                             | 0.0286     |
|  | Exact or approximate P value?       | Exact      |
|  | P value summary                     | *          |
|  | Significantly different (P < 0.05)? | Yes        |
|  | One- or two-tailed P value?         | Two-tailed |
|  | Sum of ranks in column A,B          | 10 , 26    |
|  | Mann-Whitney U                      | 0          |

|  |                                     |            |
|--|-------------------------------------|------------|
|  | <u>NE</u>                           |            |
|  | Mann Whitney test                   |            |
|  | P value                             | 0.0286     |
|  | Exact or approximate P value?       | Exact      |
|  | P value summary                     | *          |
|  | Significantly different (P < 0.05)? | Yes        |
|  | One- or two-tailed P value?         | Two-tailed |
|  | Sum of ranks in column A,B          | 10 , 26    |
|  | Mann-Whitney U                      | 0          |

|  |                                     |            |
|--|-------------------------------------|------------|
|  | <u>C3d</u>                          |            |
|  | Mann Whitney test                   |            |
|  | P value                             | 0.0286     |
|  | Exact or approximate P value?       | Exact      |
|  | P value summary                     | *          |
|  | Significantly different (P < 0.05)? | Yes        |
|  | One- or two-tailed P value?         | Two-tailed |
|  | Sum of ranks in column A,B          | 10 , 26    |
|  | Mann-Whitney U                      | 0          |

|          |                                     |            |
|----------|-------------------------------------|------------|
| <b>D</b> | <u>Ly6G</u>                         |            |
|          | Mann Whitney test                   |            |
|          | P value                             | 0.0286     |
|          | Exact or approximate P value?       | Exact      |
|          | P value summary                     | *          |
|          | Significantly different (P < 0.05)? | Yes        |
|          | One- or two-tailed P value?         | Two-tailed |
|          | Sum of ranks in column A,B          | 10 , 26    |
|          | Mann-Whitney U                      | 0          |

|  |                                     |            |
|--|-------------------------------------|------------|
|  | <u>Cit-H3</u>                       |            |
|  | Mann Whitney test                   |            |
|  | P value                             | 0.0286     |
|  | Exact or approximate P value?       | Exact      |
|  | P value summary                     | *          |
|  | Significantly different (P < 0.05)? | Yes        |
|  | One- or two-tailed P value?         | Two-tailed |
|  | Sum of ranks in column A,B          | 10 , 26    |
|  | Mann-Whitney U                      | 0          |

|  |                                     |            |
|--|-------------------------------------|------------|
|  | <u>NE</u>                           |            |
|  | Mann Whitney test                   |            |
|  | P value                             | 0.0286     |
|  | Exact or approximate P value?       | Exact      |
|  | P value summary                     | *          |
|  | Significantly different (P < 0.05)? | Yes        |
|  | One- or two-tailed P value?         | Two-tailed |
|  | Sum of ranks in column A,B          | 10 , 26    |
|  | Mann-Whitney U                      | 0          |

|  |                                     |            |
|--|-------------------------------------|------------|
|  | <u>C3d</u>                          |            |
|  | Mann Whitney test                   |            |
|  | P value                             | 0.0286     |
|  | Exact or approximate P value?       | Exact      |
|  | P value summary                     | *          |
|  | Significantly different (P < 0.05)? | Yes        |
|  | One- or two-tailed P value?         | Two-tailed |
|  | Sum of ranks in column A,B          | 10 , 26    |
|  | Mann-Whitney U                      | 0          |

|          |                                        |        |
|----------|----------------------------------------|--------|
| <b>E</b> | Log-rank (Mantel-Cox) test             |        |
|          | Chi square                             | 4.29   |
|          | df                                     | 1      |
|          | P value                                | 0.0383 |
|          | P value summary                        | *      |
|          | Are the survival curves sig different? | Yes    |

|          |                                     |            |
|----------|-------------------------------------|------------|
| <b>F</b> | Mann Whitney test                   |            |
|          | P value                             | 0.0016     |
|          | Exact or approximate P value?       | Exact      |
|          | P value summary                     | **         |
|          | Significantly different (P < 0.05)? | Yes        |
|          | One- or two-tailed P value?         | Two-tailed |
|          | Sum of ranks in column A,B          | 47 , 73    |
|          | Mann-Whitney U                      | 2          |

# Figure S2

**A**

|                                     |            |
|-------------------------------------|------------|
| Pre-AngII treatment                 |            |
| Mann Whitney test                   |            |
| P value                             | 0.1508     |
| Exact or approximate P value?       | Exact      |
| P value summary                     | ns         |
| Significantly different (P < 0.05)? | No         |
| One- or two-tailed P value?         | Two-tailed |
| Sum of ranks in column A,B          | 35 , 20    |
| Mann-Whitney U                      | 5          |

|                                     |               |
|-------------------------------------|---------------|
| Post-AngII treatment                |               |
| Mann Whitney test                   |               |
| P value                             | 0.8889        |
| Exact or approximate P value?       | Exact         |
| P value summary                     | ns            |
| Significantly different (P < 0.05)? | No            |
| One- or two-tailed P value?         | Two-tailed    |
| Sum of ranks in column A,B          | 28.50 , 26.50 |
| Mann-Whitney U                      | 11.5          |

**B**

|                                     |            |
|-------------------------------------|------------|
| Pre-AngII treatment                 |            |
| Mann Whitney test                   |            |
| P value                             | 0.2222     |
| Exact or approximate P value?       | Exact      |
| P value summary                     | ns         |
| Significantly different (P < 0.05)? | No         |
| One- or two-tailed P value?         | Two-tailed |
| Sum of ranks in column A,B          | 34 , 21    |
| Mann-Whitney U                      | 6          |

|                                     |            |
|-------------------------------------|------------|
| Post-AngII treatment                |            |
| Mann Whitney test                   |            |
| P value                             | 0.6508     |
| Exact or approximate P value?       | Exact      |
| P value summary                     | ns         |
| Significantly different (P < 0.05)? | No         |
| One- or two-tailed P value?         | Two-tailed |
| Sum of ranks in column A,B          | 30 , 25    |
| Mann-Whitney U                      | 10         |

**C**

|                                     |               |
|-------------------------------------|---------------|
| Pre-AngII treatment                 |               |
| Mann Whitney test                   |               |
| P value                             | 0.5952        |
| Exact or approximate P value?       | Exact         |
| P value summary                     | ns            |
| Significantly different (P < 0.05)? | No            |
| One- or two-tailed P value?         | Two-tailed    |
| Sum of ranks in column A,B          | 24.50 , 30.50 |
| Mann-Whitney U                      | 9.5           |

|                                     |            |
|-------------------------------------|------------|
| Post-AngII treatment                |            |
| Mann Whitney test                   |            |
| P value                             | 0.4206     |
| Exact or approximate P value?       | Exact      |
| P value summary                     | ns         |
| Significantly different (P < 0.05)? | No         |
| One- or two-tailed P value?         | Two-tailed |
| Sum of ranks in column A,B          | 32 , 23    |
| Mann-Whitney U                      | 8          |



# Figure S3

|                                     |            |
|-------------------------------------|------------|
| Mann Whitney test                   |            |
| P value                             | 0.8571     |
| Exact or approximate P value?       | Exact      |
| P value summary                     | ns         |
| Significantly different (P < 0.05)? | No         |
| One- or two-tailed P value?         | Two-tailed |
| Sum of ranks in column A,B          | 11 , 17    |
| Mann-Whitney U                      | 5          |

# Figure S4

|          |                                        |        |
|----------|----------------------------------------|--------|
| <b>A</b> | Log-rank (Mantel-Cox) test             |        |
|          | Chi square                             | 1.338  |
|          | df                                     | 1      |
|          | P value                                | 0.2473 |
|          | P value summary                        | ns     |
|          | Are the survival curves sig different? | No     |

|          |                                                                                                  |                 |              |         |                  |
|----------|--------------------------------------------------------------------------------------------------|-----------------|--------------|---------|------------------|
| <b>C</b> | Dunn's multiple comparisons test                                                                 | Mean rank diff. | Significant? | Summary | Adjusted P Value |
|          | Apoe <sup>-/-</sup> vs. Apoe <sup>-/-</sup> -TE/BAPN                                             | -7.9            | No           | ns      | 0.3462           |
|          | Apoe <sup>-/-</sup> vs. Mmp12 <sup>-/-</sup> /Apoe <sup>-/-</sup>                                | -2              | No           | ns      | >0.9999          |
|          | Apoe <sup>-/-</sup> vs. Mmp12 <sup>-/-</sup> /Apoe <sup>-/-</sup> -TE/BAPN                       | -13.75          | Yes          | **      | 0.0018           |
|          | Apoe <sup>-/-</sup> -TE/BAPN vs. Mmp12 <sup>-/-</sup> /Apoe <sup>-/-</sup>                       | 5.9             | No           | ns      | 0.9381           |
|          | Apoe <sup>-/-</sup> -TE/BAPN vs. Mmp12 <sup>-/-</sup> /Apoe <sup>-/-</sup> -TE/BAPN              | -5.85           | No           | ns      | 0.589            |
|          | Mmp12 <sup>-/-</sup> /Apoe <sup>-/-</sup> vs. Mmp12 <sup>-/-</sup> /Apoe <sup>-/-</sup> -TE/BAPN | -11.75          | Yes          | *       | 0.0119           |

|          |                                     |            |
|----------|-------------------------------------|------------|
| <b>D</b> | Ly6G                                |            |
|          | Mann Whitney test                   |            |
|          | P value                             | 0.026      |
|          | Exact or approximate P value?       | Exact      |
|          | P value summary                     | *          |
|          | Significantly different (P < 0.05)? | Yes        |
|          | One- or two-tailed P value?         | Two-tailed |
|          | Sum of ranks in column A,B          | 18 , 48    |
|          | Mann-Whitney U                      | 3          |

|  |                                     |            |
|--|-------------------------------------|------------|
|  | Cit-H3                              |            |
|  | Mann Whitney test                   |            |
|  | P value                             | 0.0043     |
|  | Exact or approximate P value?       | Exact      |
|  | P value summary                     | **         |
|  | Significantly different (P < 0.05)? | Yes        |
|  | One- or two-tailed P value?         | Two-tailed |
|  | Sum of ranks in column A,B          | 15 , 51    |
|  | Mann-Whitney U                      | 0          |

|  |                                     |            |
|--|-------------------------------------|------------|
|  | NE                                  |            |
|  | Mann Whitney test                   |            |
|  | P value                             | 0.0048     |
|  | Exact or approximate P value?       | Exact      |
|  | P value summary                     | **         |
|  | Significantly different (P < 0.05)? | Yes        |
|  | One- or two-tailed P value?         | Two-tailed |
|  | Sum of ranks in column A,B          | 10 , 45    |
|  | Mann-Whitney U                      | 0          |

# Figure S5

| Dunn's multiple comparisons test                             | Mean rank diff. | Significant? | Summary | Adjusted P Value |
|--------------------------------------------------------------|-----------------|--------------|---------|------------------|
| WT vs. WT (Pcsk9-Ad/HFD)                                     | -15.88          | Yes          | *       | 0.0155           |
| WT vs. Mmp12 <sup>-/-</sup>                                  | -2.875          | No           | ns      | >0.9999          |
| WT vs. Mmp12 <sup>-/-</sup> (Pcsk9-Ad/HFD)                   | -20.31          | Yes          | ****    | <0.0001          |
| WT (Pcsk9-Ad/HFD) vs. Mmp12 <sup>-/-</sup>                   | 13              | No           | ns      | 0.2635           |
| WT (Pcsk9-Ad/HFD) vs. Mmp12 <sup>-/-</sup> (Pcsk9-Ad/HFD)    | -4.438          | No           | ns      | >0.9999          |
| Mmp12 <sup>-/-</sup> vs. Mmp12 <sup>-/-</sup> (Pcsk9-Ad/HFD) | -17.44          | Yes          | *       | 0.0184           |

# Figure S6

|                                     |            |
|-------------------------------------|------------|
| <b>Apoe<sup>-/-</sup></b>           |            |
| Mann Whitney test                   |            |
| P value                             | 0.0317     |
| Exact or approximate P value?       | Exact      |
| P value summary                     | *          |
| Significantly different (P < 0.05)? | Yes        |
| One- or two-tailed P value?         | Two-tailed |
| Sum of ranks in column A,B          | 17 , 38    |
| Mann-Whitney U                      | 2          |

|                                     |            |
|-------------------------------------|------------|
| <b>WT</b>                           |            |
| Mann Whitney test                   |            |
| P value                             | 0.0286     |
| Exact or approximate P value?       | Exact      |
| P value summary                     | *          |
| Significantly different (P < 0.05)? | Yes        |
| One- or two-tailed P value?         | Two-tailed |
| Sum of ranks in column A,B          | 10 , 26    |
| Mann-Whitney U                      | 0          |



# Figure S7

| <b>A</b> | Dunn's multiple comparisons test | Mean rank diff. | Significant? | Summary | Adjusted P Value |
|----------|----------------------------------|-----------------|--------------|---------|------------------|
|          | Day 0 vs. Day 9                  | -3              | No           | ns      | >0.9999          |
|          | Day 0 vs. Day 0                  | 0.6             | No           | ns      | >0.9999          |
|          | Day 0 vs. Day 9                  | 2.05            | No           | ns      | >0.9999          |
|          | Day 9 vs. Day 0                  | 3.6             | No           | ns      | >0.9999          |
|          | Day 9 vs. Day 9                  | 5.05            | No           | ns      | >0.9999          |
|          | Day 0 vs. Day 9                  | 1.45            | No           | ns      | >0.9999          |

| <b>B</b> | Mann Whitney test                   |            |
|----------|-------------------------------------|------------|
|          | P value                             | 0.0286     |
|          | Exact or approximate P value?       | Exact      |
|          | P value summary                     | *          |
|          | Significantly different (P < 0.05)? | Yes        |
|          | One- or two-tailed P value?         | Two-tailed |
|          | Sum of ranks in column A,B          | 26 , 10    |
|          | Mann-Whitney U                      | 0          |

# Figure S8

|          |                                     |            |
|----------|-------------------------------------|------------|
| <b>B</b> | Mann Whitney test                   |            |
|          | P value                             | >0.9999    |
|          | Exact or approximate P value?       | Exact      |
|          | P value summary                     | ns         |
|          | Significantly different (P < 0.05)? | No         |
|          | One- or two-tailed P value?         | Two-tailed |
|          | Sum of ranks in column A,B          | 28 , 27    |
|          | Mann-Whitney U                      | 12         |

|          |                                     |            |
|----------|-------------------------------------|------------|
| <b>C</b> | Mann Whitney test                   |            |
|          | P value                             | 0.0159     |
|          | Exact or approximate P value?       | Exact      |
|          | P value summary                     | *          |
|          | Significantly different (P < 0.05)? | Yes        |
|          | One- or two-tailed P value?         | Two-tailed |
|          | Sum of ranks in column A,B          | 16 , 39    |
|          | Mann-Whitney U                      | 1          |

|          |                                     |            |
|----------|-------------------------------------|------------|
| <b>D</b> | Mann Whitney test                   |            |
|          | P value                             | 0.0079     |
|          | Exact or approximate P value?       | Exact      |
|          | P value summary                     | **         |
|          | Significantly different (P < 0.05)? | Yes        |
|          | One- or two-tailed P value?         | Two-tailed |
|          | Sum of ranks in column A,B          | 15 , 40    |
|          | Mann-Whitney U                      | 0          |

|          |                                     |            |
|----------|-------------------------------------|------------|
| <b>E</b> | Mann Whitney test                   |            |
|          | P value                             | 0.0079     |
|          | Exact or approximate P value?       | Exact      |
|          | P value summary                     | **         |
|          | Significantly different (P < 0.05)? | Yes        |
|          | One- or two-tailed P value?         | Two-tailed |
|          | Sum of ranks in column A,B          | 15 , 40    |
|          | Mann-Whitney U                      | 0          |

# Figure S9

|                                        |        |
|----------------------------------------|--------|
| Log-rank (Mantel-Cox) test             |        |
| Chi square                             | 1.579  |
| df                                     | 1      |
| P value                                | 0.2089 |
| P value summary                        | ns     |
| Are the survival curves sig different? | No     |

# Figure S12

|          |                                     |            |
|----------|-------------------------------------|------------|
| <b>A</b> | Mann Whitney test                   |            |
|          | P value                             | 0.0286     |
|          | Exact or approximate P value?       | Exact      |
|          | P value summary                     | *          |
|          | Significantly different (P < 0.05)? | Yes        |
|          | One- or two-tailed P value?         | Two-tailed |
|          | Sum of ranks in column A,B          | 10 , 26    |
|          | Mann-Whitney U                      | 0          |

|          |                                     |            |
|----------|-------------------------------------|------------|
| <b>B</b> | Mann Whitney test                   |            |
|          | P value                             | 0.0286     |
|          | Exact or approximate P value?       | Exact      |
|          | P value summary                     | *          |
|          | Significantly different (P < 0.05)? | Yes        |
|          | One- or two-tailed P value?         | Two-tailed |
|          | Sum of ranks in column A,B          | 10 , 26    |
|          | Mann-Whitney U                      | 0          |

|          |                                     |            |
|----------|-------------------------------------|------------|
| <b>C</b> | Mann Whitney test                   |            |
|          | P value                             | 0.0286     |
|          | Exact or approximate P value?       | Exact      |
|          | P value summary                     | *          |
|          | Significantly different (P < 0.05)? | Yes        |
|          | One- or two-tailed P value?         | Two-tailed |
|          | Sum of ranks in column A,B          | 10 , 26    |
|          | Mann-Whitney U                      | 0          |

|          |                                     |            |
|----------|-------------------------------------|------------|
| <b>D</b> | Mann Whitney test                   |            |
|          | P value                             | 0.0159     |
|          | Exact or approximate P value?       | Exact      |
|          | P value summary                     | *          |
|          | Significantly different (P < 0.05)? | Yes        |
|          | One- or two-tailed P value?         | Two-tailed |
|          | Sum of ranks in column A,B          | 15 , 30    |
|          | Mann-Whitney U                      | 0          |



## Major Resources Table

In order to allow validation and replication of experiments, all essential research materials listed in the Methods should be included in the Major Resources Table below. Authors are encouraged to use public repositories for protocols, data, code, and other materials and provide persistent identifiers and/or links to repositories when available. Authors may add or delete rows as needed.

### Animals (in vivo studies)

| Species | Vendor or Source   | Background Strain                                         | Sex | Persistent ID / URL                                                                                                                                         |
|---------|--------------------|-----------------------------------------------------------|-----|-------------------------------------------------------------------------------------------------------------------------------------------------------------|
| Mouse   | Jackson Laboratory | B6.129P2- <i>Apoe</i> <sup>tm1Unc</sup> /J mice           | M/F | <a href="https://www.jax.org/strain/002052">https://www.jax.org/strain/002052</a>                                                                           |
| Mouse   | Jackson Laboratory | B6.129X-Mmp12 <sup>tm1Sds</sup> /J                        | M/F | <a href="https://www.jax.org/strain/004855">https://www.jax.org/strain/004855</a>                                                                           |
| Mouse   | Infrafrontier GmbH | C57BL/6N<br><i>Mmp12</i> <sup>tm1a(EUCOMM)Hmgu/H</sup>    | M/F | <a href="https://www.infrafrontier.eu/emma/strain-search/strainsdetails/?q=5321">https://www.infrafrontier.eu/emma/strain-search/strainsdetails/?q=5321</a> |
| Mouse   | Jackson Laboratory | B6.Cg-Tg(Pgk1-flpo)10Sykr/J                               | M/F | <a href="https://www.jax.org/strain/011065">https://www.jax.org/strain/011065</a>                                                                           |
| Mouse   | Jackson Laboratory | Tg(Csf1r-Mer-iCre-Mer)1Jwp                                | M/F | <a href="https://www.jax.org/strain/019098">https://www.jax.org/strain/019098</a>                                                                           |
| Mouse   | Jackson Laboratory | B6.129S4- <i>Gt(ROSA)26Sor</i> <sup>tm2(FLP*)Sor</sup> /J | M/F | <a href="https://www.jax.org/strain/012930">https://www.jax.org/strain/012930</a>                                                                           |

### Genetically Modified Animals

|                 | Species                                                                            | Vendor or Source | Background Strain               | Other Information | Persistent ID / URL |
|-----------------|------------------------------------------------------------------------------------|------------------|---------------------------------|-------------------|---------------------|
| Parent - Male   | <i>Mmp12</i> <sup>flox/flox</sup> / <i>Apoe</i> <sup>-/-</sup> / <i>Csf1r-iCre</i> | In-house         | C57BL/6, 129 S4                 |                   | N/A                 |
| Parent - Female | <i>Mmp12</i> <sup>flox/flox</sup> / <i>Apoe</i> <sup>-/-</sup> / <i>Csf1r-iCre</i> | In-house         | C57BL/6, 129 S4                 |                   | N/A                 |
| Parent - Male   | <i>Mmp12</i> <sup>flox/flox</sup> / <i>Csf1r-iCre</i>                              | In-house         | C57BL/6, 129 S4/SvJaeSor, FVB/N |                   | N/A                 |
| Parent - Female | <i>Mmp12</i> <sup>flox/flox</sup> / <i>Csf1r-iCre</i>                              | In-house         | C57BL/6, 129 S4/SvJaeSor, FVB/N |                   | N/A                 |
| Parent - Male   | <i>Mmp12</i> <sup>flox/flox</sup> / <i>Apoe</i> <sup>-/-</sup>                     | In-house         | C57BL/6, 129 S4/SvJaeSor, FVB/N |                   | N/A                 |
| Parent - Female | <i>Mmp12</i> <sup>flox/flox</sup> / <i>Apoe</i> <sup>-/-</sup>                     | In-house         | C57BL/6, 129 S4/SvJaeSor, FVB/N |                   | N/A                 |
| Parent - Male   | <i>Mmp12</i> <sup>flox/flox</sup>                                                  | In-house         | C57BL/6, 129 S4/SvJaeSor, FVB/N |                   | N/A                 |
| Parent - Female | <i>Mmp12</i> <sup>flox/flox</sup>                                                  | In-house         | C57BL/6, 129 S4/SvJaeSor, FVB/N |                   | N/A                 |
| Parent - Male   | <i>Mmp12</i> <sup>-/-</sup> / <i>Apoe</i> <sup>-/-</sup>                           | In-house         | C57BL/6                         |                   | N/A                 |

|                 |                                               |          |         |  |     |
|-----------------|-----------------------------------------------|----------|---------|--|-----|
| Parent - Female | <i>Mmp12<sup>-/-</sup>/Apoe<sup>-/-</sup></i> | In-house | C57BL/6 |  | N/A |
|-----------------|-----------------------------------------------|----------|---------|--|-----|

### Antibodies

| Target antigen                              | Vendor or Source         | Catalog # | Working concentration | Lot # (preferred but not required) | Persistent ID / URL                                                                                                                                                                                                                                                             |
|---------------------------------------------|--------------------------|-----------|-----------------------|------------------------------------|---------------------------------------------------------------------------------------------------------------------------------------------------------------------------------------------------------------------------------------------------------------------------------|
| Anti-Ly6G clone 1A8                         | Bio X Cell               | BP0075-1  | 1:100                 |                                    | <a href="https://bioxcell.com/invivoplus-anti-mouse-ly6g-bp0075-1">https://bioxcell.com/invivoplus-anti-mouse-ly6g-bp0075-1</a>                                                                                                                                                 |
| Anti-Histone H3 (citrulline R2 + R8 + R17): | Abcam                    | ab5103    | 1:100                 |                                    | <a href="https://www.abcam.com/histone-h3-citrulline-r2-r8-r17-antibody-ab5103.html">https://www.abcam.com/histone-h3-citrulline-r2-r8-r17-antibody-ab5103.html</a>                                                                                                             |
| Anti-Neutrophil elastase                    | Abcam                    | ab68672   | 1:100                 |                                    | <a href="https://www.abcam.com/neutrophil-elastase-antibody-ab68672.html">https://www.abcam.com/neutrophil-elastase-antibody-ab68672.html</a>                                                                                                                                   |
| Anti-Complement C3                          | MP Biomedicals           | 55463     | 1:100                 |                                    | <a href="https://www.mpbio.com/0855463-goat-igg-fraction-to-mouse-complement-c3">https://www.mpbio.com/0855463-goat-igg-fraction-to-mouse-complement-c3</a>                                                                                                                     |
| Anti-Tropoelastin                           | Abcam                    | ab21600   | 1:100                 |                                    | <a href="https://www.abcam.com/tropoelastin-antibody-ab21600.html">https://www.abcam.com/tropoelastin-antibody-ab21600.html</a>                                                                                                                                                 |
| Anti-C3d                                    | R&D Systems              | BAF2655   | 1:200                 |                                    | <a href="https://www.rndsystems.com/products/mouse-complement-component-c3d-biotinylated-antibody_baf2655">https://www.rndsystems.com/products/mouse-complement-component-c3d-biotinylated-antibody_baf2655</a>                                                                 |
| Anti-CD68                                   | Abcam                    | ab53444   | 1:100                 |                                    | <a href="https://www.abcam.com/cd68-antibody-fa-11-ab53444.html">https://www.abcam.com/cd68-antibody-fa-11-ab53444.html</a>                                                                                                                                                     |
| Anti-CD31                                   | Millipore Sigma          | MAB1398Z  | 1:100                 |                                    | <a href="https://www.emdmillipore.com/US/en/product/Anti-PECAM-1-Antibody-clone-2H8-Azide-Free_MM_NF-MAB1398Z">https://www.emdmillipore.com/US/en/product/Anti-PECAM-1-Antibody-clone-2H8-Azide-Free_MM_NF-MAB1398Z</a>                                                         |
| Anti- $\alpha$ -Smooth muscle actin         | Millipore Sigma          | A2547     | 1:100                 |                                    | <a href="https://www.sigmaaldrich.com/US/en/product/sigma/a2547">https://www.sigmaaldrich.com/US/en/product/sigma/a2547</a>                                                                                                                                                     |
| Anti-Rat Alexa Fluor 555                    | Thermo Fisher Scientific | A-48270   | 1:200                 |                                    | <a href="https://www.thermofisher.com/antibody/product/Donkey-anti-Rat-IgG-H-L-Highly-Cross-Adsorbed-Secondary-Antibody-Polyclonal/A48270">https://www.thermofisher.com/antibody/product/Donkey-anti-Rat-IgG-H-L-Highly-Cross-Adsorbed-Secondary-Antibody-Polyclonal/A48270</a> |
| Anti-Rat Alexa Fluor 594                    | Thermo Fisher Scientific | A-11007   | 1:200                 |                                    | <a href="https://www.thermofisher.com/antibody/product/Goat-anti-Rat-IgG-H-L-Cross-Adsorbed-Secondary-Antibody-Polyclonal/A-11007">https://www.thermofisher.com/antibody/product/Goat-anti-Rat-IgG-H-L-Cross-Adsorbed-Secondary-Antibody-Polyclonal/A-11007</a>                 |
| Anti-Rabbit                                 | Thermo Fisher Scientific | A-11012   | 1:200                 |                                    | <a href="https://www.thermofisher.com/antibody/product/Goat-anti-Rabbit-IgG-H-L-Cross-Adsorbed-Secondary-Antibody-Polyclonal/A-11012">https://www.thermofisher.com/antibody/product/Goat-anti-Rabbit-IgG-H-L-Cross-Adsorbed-Secondary-Antibody-Polyclonal/A-11012</a>           |

|                              |                         |           |                                   |  |                                                                                                                                                                                                                                                                                                                                                 |
|------------------------------|-------------------------|-----------|-----------------------------------|--|-------------------------------------------------------------------------------------------------------------------------------------------------------------------------------------------------------------------------------------------------------------------------------------------------------------------------------------------------|
| Alexa Fluor 594              |                         |           |                                   |  |                                                                                                                                                                                                                                                                                                                                                 |
| <i>Mmp12</i>                 | HuluFish                | Q2022016  | 1:100 (Probe to HuluHyb solution) |  | <a href="https://www.pixelbiotech.com/product-page/copy-of-hulufish-plus-kit-nano-ideal-for-ffpe-sample">https://www.pixelbiotech.com/product-page/copy-of-hulufish-plus-kit-nano-ideal-for-ffpe-sample</a>                                                                                                                                     |
| Collagen Hybridizing Peptide | 3Helix                  | R-CHP     | 20 µM                             |  | <a href="https://www.3helix.com/product/red300/">https://www.3helix.com/product/red300/</a>                                                                                                                                                                                                                                                     |
| Anti-Complement C3           | Novus                   | NB200-540 | 100 µg/mL                         |  | <a href="https://www.novusbio.com/products/complement-c3-antibody-11h9_nb200-540">https://www.novusbio.com/products/complement-c3-antibody-11h9_nb200-540</a>                                                                                                                                                                                   |
| Anti-C5a                     | R&D Systems             | MAB21501  | 100 µg/mL                         |  | <a href="https://www.rndsystems.com/products/mouse-complement-component-c5a-antibody-295108_mab21501">https://www.rndsystems.com/products/mouse-complement-component-c5a-antibody-295108_mab21501</a>                                                                                                                                           |
| Anti-C5a                     | R&D Systems             | AF2150    | 5 µg/mL                           |  | <a href="https://www.rndsystems.com/products/mouse-complement-component-c5a-antibody_af2150">https://www.rndsystems.com/products/mouse-complement-component-c5a-antibody_af2150</a>                                                                                                                                                             |
| Anti-CD45                    | BioLegend               | 103105    | 2 µg/mL                           |  | <a href="https://www.biolegend.com/en-us/products/pe-anti-mouse-cd45-antibody-100">https://www.biolegend.com/en-us/products/pe-anti-mouse-cd45-antibody-100</a>                                                                                                                                                                                 |
| Anti-Ly6G                    | BD Biosciences          | 560599    | 2 µg/mL                           |  | <a href="https://wwwbdbiosciences.com/en-us/products/reagents/flow-cytometry-reagents/research-reagents/single-color-antibodies-ruo/apc-rat-anti-mouse-ly-6g.560599">https://wwwbdbiosciences.com/en-us/products/reagents/flow-cytometry-reagents/research-reagents/single-color-antibodies-ruo/apc-rat-anti-mouse-ly-6g.560599</a>             |
| Anti-CD11b                   | BD Biosciences          | 557672    | 2 µg/mL                           |  | <a href="https://wwwbdbiosciences.com/en-us/products/reagents/flow-cytometry-reagents/research-reagents/single-color-antibodies-ruo/alexa-fluor-488-rat-anti-cd11b.557672">https://wwwbdbiosciences.com/en-us/products/reagents/flow-cytometry-reagents/research-reagents/single-color-antibodies-ruo/alexa-fluor-488-rat-anti-cd11b.557672</a> |
| MOPC                         | Alexion Pharmaceuticals | N/A       | 40 mg/kg                          |  | Provided by Alexion Pharmaceuticals, New Haven, CT.                                                                                                                                                                                                                                                                                             |
| BB5.1                        | Alexion Pharmaceuticals | N/A       | 40 mg/kg                          |  | Provided by Alexion Pharmaceuticals, New Haven, CT.                                                                                                                                                                                                                                                                                             |

#### DNA/cDNA Clones

| Clone Name | Sequence | Source / Repository | Persistent ID / URL |
|------------|----------|---------------------|---------------------|
|            |          |                     |                     |
|            |          |                     |                     |
|            |          |                     |                     |

#### Cultured Cells

| Name                                                        | Vendor or Source                                        | Sex (F, M, or unknown) | Persistent ID / URL |
|-------------------------------------------------------------|---------------------------------------------------------|------------------------|---------------------|
| <i>Mmp12</i> <sup>-/-</sup> bone marrow-derived macrophages | Csflr-Mer-iCre-Mer: <i>Mmp12</i> <sup>fllox/fllox</sup> | unknown                | N/A                 |
|                                                             |                                                         |                        |                     |
|                                                             |                                                         |                        |                     |

#### Data & Code Availability

| Description | Source / Repository | Persistent ID / URL |
|-------------|---------------------|---------------------|
|             |                     |                     |

|                |                               |                                                                                                                                                                   |
|----------------|-------------------------------|-------------------------------------------------------------------------------------------------------------------------------------------------------------------|
| FlowJo         | BD Biosciences                | <a href="https://www.bdbiosciences.com/en-ca/products/software/flowjo-v10-software">https://www.bdbiosciences.com/en-ca/products/software/flowjo-v10-software</a> |
| ImageJ         | National Institutes of Health | <a href="https://imagej.nih.gov/ij/download.html">https://imagej.nih.gov/ij/download.html</a>                                                                     |
| GraphPad Prism | GraphPad                      | <a href="https://www.graphpad.com">https://www.graphpad.com</a>                                                                                                   |

### Other

| <b>Description</b>                 | <b>Source / Repository</b> | <b>Persistent ID / URL</b>                                                                                                                                                                                  |
|------------------------------------|----------------------------|-------------------------------------------------------------------------------------------------------------------------------------------------------------------------------------------------------------|
| Recombinant mouse C5a              | R&D, 2150-C5-025           | <a href="https://www.rndsystems.com/products/recombinant-mouse-complement-component-c5a-protein_2150-c5">https://www.rndsystems.com/products/recombinant-mouse-complement-component-c5a-protein_2150-c5</a> |
| C5-deficient NOD-SCID mouse plasma | BIOIVT                     | MSE61PLKZYNN                                                                                                                                                                                                |
| IgG-FH <sub>1.5</sub>              | Alexion Pharmaceuticals    | Working concentration: 56 mg/kg<br>Provided by Alexion Pharmaceuticals, New Haven, CT.                                                                                                                      |
| $\beta$ -actin                     | Thermo Fisher Scientific   | Mn00607939_s1                                                                                                                                                                                               |
| Elastin                            | Thermo Fisher Scientific   | Mm00514670_m1                                                                                                                                                                                               |
| <i>Eln</i>                         | Thermo Fisher Scientific   | Mm00500554_m1                                                                                                                                                                                               |

## ARRIVE GUIDELINES

The ARRIVE guidelines (<https://arriveguidelines.org/>) are a checklist of recommendations to improve the reporting of research involving animals. Key elements of the study design should be included below to better enable readers to scrutinize the research adequately, evaluate its methodological rigor, and reproduce the methods or findings.

### Study Design

| Groups                                                                                       | Sex | Age | Number (prior to experiment) | Number (after termination) | Littermates (Yes/No) | Other description                                         |
|----------------------------------------------------------------------------------------------|-----|-----|------------------------------|----------------------------|----------------------|-----------------------------------------------------------|
| Group 1 Control- <i>Apoe</i> <sup>-/-</sup>                                                  | M   | 12w | 66                           | 42                         | No                   | Ang II treatment studies                                  |
| Group 2 <i>Mmp12</i> <sup>+/-</sup> / <i>Apoe</i> <sup>-/-</sup>                             | M   | 12w | 36                           | 5                          | No                   | Ang II treatment studies                                  |
|                                                                                              |     |     |                              |                            |                      |                                                           |
| Groups                                                                                       | Sex | Age | Number (prior to experiment) | Number (after termination) | Littermates (Yes/No) | Other description                                         |
| Group 1 Control- <i>WT</i>                                                                   | M   | 12w | 17                           | 13                         | No                   | PCSK9/HFD/Ang II treatment studies                        |
| Group 2 <i>Mmp12</i> <sup>-/-</sup>                                                          | M   | 12w | 20                           | 9                          | No                   | PCSK9/HFD/Ang II treatment studies                        |
|                                                                                              |     |     |                              |                            |                      |                                                           |
| Groups                                                                                       | Sex | Age | Number (prior to experiment) | Number (after termination) | Littermates (Yes/No) | Other description                                         |
| Group 1 Control- <i>MOPC-Mmp12</i> <sup>-/-</sup>                                            | M   | 12w | 10                           | 4                          | No                   | PCSK9/HFD/MOPC/Ang II treatment studies                   |
| Group 2 <i>FH-Mmp12</i> <sup>-/-</sup>                                                       | M   | 12w | 10                           | 8                          | No                   | PCSK9/HFD/IgG-FH <sub>1.5</sub> /Ang II treatment studies |
|                                                                                              |     |     |                              |                            |                      |                                                           |
| Groups                                                                                       | Sex | Age | Number (prior to experiment) | Number (after termination) | Littermates (Yes/No) | Other description                                         |
| Group 1 Control- <i>Mmp12</i> <sup>fllox/fllox</sup> / <i>Apoe</i> <sup>-/-</sup>            | M   | 12w | 9                            | 9                          | No                   | Ang II treatment studies                                  |
| Group 2 <i>Mmp12</i> <sup>fllox/fllox</sup> / <i>Apoe</i> <sup>-/-</sup> / <i>Csflr-iCre</i> | M   | 12w | 10                           | 6                          | No                   | Ang II treatment studies                                  |
|                                                                                              |     |     |                              |                            |                      |                                                           |
| Groups                                                                                       | Sex | Age | Number (prior to experiment) | Number (after termination) | Littermates (Yes/No) | Other description                                         |
| Group 1 Control- <i>TE/BAPN-Apoe</i> <sup>-/-</sup>                                          | M   | 12w | 5                            | 5                          | No                   | TE/BAPN treatment studies                                 |
| Group 2 <i>TE/BAPN-Mmp12</i> <sup>-/-</sup> / <i>Apoe</i> <sup>-/-</sup>                     | M   | 12w | 8                            | 6                          | No                   | TE/BAPN treatment studies                                 |

| <b>Groups</b>                                                          | <b>Sex</b> | <b>Age</b> | <b>Number (prior to experiment)</b> | <b>Number (after termination)</b> | <b>Littermates (Yes/No)</b> | <b>Other description</b>                        |
|------------------------------------------------------------------------|------------|------------|-------------------------------------|-----------------------------------|-----------------------------|-------------------------------------------------|
| Group 1 Control-<br><i>MOPC-Mmp12<sup>-/-</sup>/Apoe<sup>-/-</sup></i> | M          | 12w        | 14                                  | 2                                 | No                          | MOPC/Ang II treatment studies                   |
| Group 2<br><i>FH-Mmp12<sup>-/-</sup>/Apoe<sup>-/-</sup></i>            | M          | 12w        | 15                                  | 6                                 | No                          | IgG-FH <sub>1-5</sub> /Ang II treatment studies |
|                                                                        |            |            |                                     |                                   |                             |                                                 |

**Sample Size:** Please explain how the sample size was decided Please provide details of any a *prior* sample size calculation, if done.

Samples sizes were determined based on literature and previous experience/studies.

**Inclusion Criteria**

All animals within a group were included for analysis

**Exclusion Criteria**

Animals were not excluded.

**Randomization**

Randomization was not performed when assigning animals to groups.

**Blinding**

Blinding of investigators were not performed for data acquisition and analysis.
